# Supplementary material
Source: publisher figshare collection journal article supplement (https://acs.figshare.com/ndownloader/files/4644520)
Supplement: Supplementary file 1 [file 4644520]

data_07046
 
_audit_creation_method            SHELXL-97
_chemical_name_systematic
;
 ?
;
_chemical_name_common             ?
_chemical_melting_point           ?
_chemical_formula_moiety          ?
_chemical_formula_sum
 'C19 H41 N5 Pd'
_chemical_formula_weight          445.97
 
loop_
 _atom_type_symbol
 _atom_type_description
 _atom_type_scat_dispersion_real
 _atom_type_scat_dispersion_imag
 _atom_type_scat_source
 'C'  'C'   0.0033   0.0016
 'International Tables Vol C Tables 4.2.6.8 and 6.1.1.4'
 'H'  'H'   0.0000   0.0000
 'International Tables Vol C Tables 4.2.6.8 and 6.1.1.4'
 'N'  'N'   0.0061   0.0033
 'International Tables Vol C Tables 4.2.6.8 and 6.1.1.4'
 'Pd'  'Pd'  -0.9988   1.0072
 'International Tables Vol C Tables 4.2.6.8 and 6.1.1.4'
 
_symmetry_cell_setting            Monoclinic
_symmetry_space_group_name_H-M    P2(1)/c
 
loop_
 _symmetry_equiv_pos_as_xyz
 'x, y, z'
 '-x, y+1/2, -z+1/2'
 '-x, -y, -z'
 'x, -y-1/2, z-1/2'
 
_cell_length_a                    19.696(4)
_cell_length_b                    8.3139(16)
_cell_length_c                    14.012(3)
_cell_angle_alpha                 90.00
_cell_angle_beta                  96.275(2)
_cell_angle_gamma                 90.00
_cell_volume                      2280.7(8)
_cell_formula_units_Z             4
_cell_measurement_temperature     293(2)
_cell_measurement_reflns_used     ?
_cell_measurement_theta_min       ?
_cell_measurement_theta_max       ?
 
_exptl_crystal_description        sq.prism
_exptl_crystal_colour             colourless
_exptl_crystal_size_min           0.180
_exptl_crystal_size_mid           0.180
_exptl_crystal_size_max           0.500
_exptl_crystal_density_meas       ?
_exptl_crystal_density_diffrn     1.299
_exptl_crystal_density_method     'not measured'
_exptl_crystal_F_000              944
_exptl_absorpt_coefficient_mu     0.825
_exptl_absorpt_correction_type    none
_exptl_absorpt_correction_T_min   ?
_exptl_absorpt_correction_T_max   ?
_exptl_absorpt_process_details    ?
 
_exptl_special_details
;
 ?
;
 
_diffrn_ambient_temperature       293(2)
_diffrn_radiation_wavelength      0.71073
_diffrn_radiation_type            MoK\a
_diffrn_radiation_source          'fine-focus sealed tube'
_diffrn_radiation_monochromator   graphite
_diffrn_measurement_device_type   'Bruker P4'
_diffrn_measurement_method        '\w scans'
_diffrn_detector_area_resol_mean  ?
_diffrn_standards_number          ?
_diffrn_standards_interval_count  ?
_diffrn_standards_interval_time   ?
_diffrn_standards_decay_%         ?
_diffrn_reflns_number             29852
_diffrn_reflns_av_R_equivalents   0.0382
_diffrn_reflns_av_sigmaI/netI     0.0280
_diffrn_reflns_limit_h_min        -26
_diffrn_reflns_limit_h_max        26
_diffrn_reflns_limit_k_min        -11
_diffrn_reflns_limit_k_max        10
_diffrn_reflns_limit_l_min        -18
_diffrn_reflns_limit_l_max        18
_diffrn_reflns_theta_min          1.04
_diffrn_reflns_theta_max          28.32
_reflns_number_total              5672
_reflns_number_gt                 4905
_reflns_threshold_expression      >2sigma(I)
 
_computing_data_collection        'Bruker XSCANS'
_computing_cell_refinement        'Bruker XSCANS'
_computing_data_reduction         'Bruker SHELXTL'
_computing_structure_solution     'SHELXS-97 (Sheldrick, 1990)'
_computing_structure_refinement   'SHELXL-97 (Sheldrick, 1997)'
_computing_molecular_graphics     'Bruker SHELXTL'
_computing_publication_material   'Bruker SHELXTL'
 
_refine_special_details
;
 Refinement of F^2^ against ALL reflections.  The weighted R-factor wR and
 goodness of fit S are based on F^2^, conventional R-factors R are based
 on F, with F set to zero for negative F^2^. The threshold expression of
 F^2^ > 2sigma(F^2^) is used only for calculating R-factors(gt) etc. and is
 not relevant to the choice of reflections for refinement.  R-factors based
 on F^2^ are statistically about twice as large as those based on F, and R-
 factors based on ALL data will be even larger.
;
 
_refine_ls_structure_factor_coef  Fsqd
_refine_ls_matrix_type            full
_refine_ls_weighting_scheme       calc
_refine_ls_weighting_details
 'calc w=1/[\s^2^(Fo^2^)+(0.0250P)^2^+0.5956P] where P=(Fo^2^+2Fc^2^)/3'
_atom_sites_solution_primary      direct
_atom_sites_solution_secondary    difmap
_atom_sites_solution_hydrogens    geom
_refine_ls_hydrogen_treatment     riding
_refine_ls_extinction_method      none
_refine_ls_extinction_coef        ?
_refine_ls_number_reflns          5672
_refine_ls_number_parameters      238
_refine_ls_number_restraints      0
_refine_ls_R_factor_all           0.0297
_refine_ls_R_factor_gt            0.0235
_refine_ls_wR_factor_ref          0.0585
_refine_ls_wR_factor_gt           0.0551
_refine_ls_goodness_of_fit_ref    1.056
_refine_ls_restrained_S_all       1.056
_refine_ls_shift/su_max           0.002
_refine_ls_shift/su_mean          0.000
 
loop_
 _atom_site_label
 _atom_site_type_symbol
 _atom_site_fract_x
 _atom_site_fract_y
 _atom_site_fract_z
 _atom_site_U_iso_or_equiv
 _atom_site_adp_type
 _atom_site_occupancy
 _atom_site_symmetry_multiplicity
 _atom_site_calc_flag
 _atom_site_refinement_flags
 _atom_site_disorder_assembly
 _atom_site_disorder_group
Pd1 Pd 0.258002(6) 0.569577(14) 0.277186(8) 0.02386(5) Uani 1 1 d . . .
N1 N 0.41208(8) 0.4701(2) 0.32479(12) 0.0444(4) Uani 1 1 d . . .
C1 C 0.35597(9) 0.5086(2) 0.30767(12) 0.0303(4) Uani 1 1 d . . .
N2 N 0.22310(7) 0.26434(18) 0.14124(10) 0.0324(3) Uani 1 1 d . . .
C2 C 0.23688(8) 0.3736(2) 0.18983(12) 0.0252(3) Uani 1 1 d . . .
C3 C 0.16152(9) 0.6474(2) 0.25412(12) 0.0278(3) Uani 1 1 d . . .
N3 N 0.10607(8) 0.6912(2) 0.23894(12) 0.0391(4) Uani 1 1 d . . .
N4 N 0.11933(6) 0.12513(16) 0.38702(9) 0.0217(3) Uani 1 1 d . . .
C4 C 0.18375(8) 0.05701(19) 0.35102(12) 0.0255(3) Uani 1 1 d . . .
H4A H 0.1773 -0.0574 0.3400 0.031 Uiso 1 1 calc R . .
H4B H 0.1894 0.1064 0.2897 0.031 Uiso 1 1 calc R . .
N5 N 0.37739(7) -0.03241(16) 0.12123(9) 0.0227(3) Uani 1 1 d . . .
C5 C 0.24869(9) 0.0814(2) 0.41744(14) 0.0363(4) Uani 1 1 d . . .
H5A H 0.2849 0.0203 0.3945 0.054 Uiso 1 1 calc R . .
H5B H 0.2418 0.0459 0.4809 0.054 Uiso 1 1 calc R . .
H5C H 0.2606 0.1934 0.4192 0.054 Uiso 1 1 calc R . .
C6 C 0.10435(8) 0.0446(2) 0.47967(11) 0.0261(3) Uani 1 1 d . . .
H6A H 0.1411 0.0702 0.5291 0.031 Uiso 1 1 calc R . .
H6B H 0.0628 0.0908 0.4991 0.031 Uiso 1 1 calc R . .
C7 C 0.09612(10) -0.1362(2) 0.47546(13) 0.0347(4) Uani 1 1 d . . .
H7A H 0.0901 -0.1763 0.5382 0.052 Uiso 1 1 calc R . .
H7B H 0.1361 -0.1837 0.4538 0.052 Uiso 1 1 calc R . .
H7C H 0.0569 -0.1633 0.4316 0.052 Uiso 1 1 calc R . .
C8 C 0.06030(8) 0.0938(2) 0.31020(12) 0.0278(3) Uani 1 1 d . . .
H8A H 0.0180 0.1202 0.3362 0.033 Uiso 1 1 calc R . .
H8B H 0.0592 -0.0201 0.2953 0.033 Uiso 1 1 calc R . .
C9 C 0.06298(9) 0.1872(3) 0.21751(13) 0.0387(4) Uani 1 1 d . . .
H9A H 0.0215 0.1700 0.1761 0.058 Uiso 1 1 calc R . .
H9B H 0.1011 0.1508 0.1861 0.058 Uiso 1 1 calc R . .
H9C H 0.0681 0.2998 0.2317 0.058 Uiso 1 1 calc R . .
C10 C 0.13002(9) 0.30301(19) 0.40635(13) 0.0299(4) Uani 1 1 d . . .
H10A H 0.1462 0.3522 0.3503 0.036 Uiso 1 1 calc R . .
H10B H 0.1655 0.3158 0.4595 0.036 Uiso 1 1 calc R . .
C11 C 0.06669(10) 0.3930(2) 0.43001(16) 0.0406(5) Uani 1 1 d . . .
H11A H 0.0768 0.5057 0.4364 0.061 Uiso 1 1 calc R . .
H11B H 0.0529 0.3530 0.4892 0.061 Uiso 1 1 calc R . .
H11C H 0.0304 0.3771 0.3794 0.061 Uiso 1 1 calc R . .
C12 C 0.36476(9) 0.0149(2) 0.22229(11) 0.0304(4) Uani 1 1 d . . .
H12A H 0.3327 -0.0609 0.2451 0.036 Uiso 1 1 calc R . .
H12B H 0.3434 0.1201 0.2200 0.036 Uiso 1 1 calc R . .
C13 C 0.42818(10) 0.0202(3) 0.29418(14) 0.0473(5) Uani 1 1 d . . .
H13A H 0.4172 0.0689 0.3527 0.071 Uiso 1 1 calc R . .
H13B H 0.4629 0.0823 0.2682 0.071 Uiso 1 1 calc R . .
H13C H 0.4446 -0.0872 0.3071 0.071 Uiso 1 1 calc R . .
C14 C 0.42782(8) 0.08042(19) 0.08029(12) 0.0259(3) Uani 1 1 d . . .
H14A H 0.4728 0.0623 0.1141 0.031 Uiso 1 1 calc R . .
H14B H 0.4299 0.0532 0.0134 0.031 Uiso 1 1 calc R . .
C15 C 0.41065(9) 0.2578(2) 0.08691(14) 0.0369(4) Uani 1 1 d . . .
H15A H 0.4438 0.3203 0.0577 0.055 Uiso 1 1 calc R . .
H15B H 0.4113 0.2879 0.1531 0.055 Uiso 1 1 calc R . .
H15C H 0.3661 0.2773 0.0541 0.055 Uiso 1 1 calc R . .
C16 C 0.31052(8) -0.0230(2) 0.05619(12) 0.0264(3) Uani 1 1 d . . .
H16A H 0.2936 0.0864 0.0572 0.032 Uiso 1 1 calc R . .
H16B H 0.3197 -0.0463 -0.0090 0.032 Uiso 1 1 calc R . .
C17 C 0.25478(10) -0.1355(3) 0.08202(15) 0.0407(4) Uani 1 1 d . . .
H17A H 0.2158 -0.1265 0.0348 0.061 Uiso 1 1 calc R . .
H17B H 0.2419 -0.1069 0.1439 0.061 Uiso 1 1 calc R . .
H17C H 0.2713 -0.2441 0.0837 0.061 Uiso 1 1 calc R . .
C18 C 0.40699(10) -0.2006(2) 0.12408(13) 0.0350(4) Uani 1 1 d . . .
H18A H 0.3791 -0.2691 0.1601 0.042 Uiso 1 1 calc R . .
H18B H 0.4524 -0.1972 0.1586 0.042 Uiso 1 1 calc R . .
C19 C 0.41167(11) -0.2766(2) 0.02659(15) 0.0424(5) Uani 1 1 d . . .
H19A H 0.4351 -0.3777 0.0347 0.064 Uiso 1 1 calc R . .
H19B H 0.4363 -0.2063 -0.0116 0.064 Uiso 1 1 calc R . .
H19C H 0.3665 -0.2938 -0.0050 0.064 Uiso 1 1 calc R . .
H1 H 0.2775(11) 0.721(3) 0.3462(16) 0.062(7) Uiso 1 1 d . . .
 
loop_
 _atom_site_aniso_label
 _atom_site_aniso_U_11
 _atom_site_aniso_U_22
 _atom_site_aniso_U_33
 _atom_site_aniso_U_23
 _atom_site_aniso_U_13
 _atom_site_aniso_U_12
Pd1 0.02354(7) 0.02574(7) 0.02214(7) 0.00090(5) 0.00180(5) -0.00150(5)
N1 0.0309(9) 0.0635(11) 0.0377(9) -0.0067(8) -0.0020(7) -0.0005(8)
C1 0.0294(9) 0.0368(9) 0.0241(8) -0.0017(7) 0.0007(7) -0.0044(7)
N2 0.0307(8) 0.0359(8) 0.0303(7) -0.0038(6) 0.0020(6) 0.0054(6)
C2 0.0198(8) 0.0326(8) 0.0234(7) 0.0026(7) 0.0030(6) 0.0037(6)
C3 0.0305(9) 0.0252(8) 0.0281(8) -0.0032(7) 0.0055(7) -0.0019(7)
N3 0.0305(8) 0.0414(9) 0.0453(9) -0.0093(7) 0.0042(7) 0.0014(7)
N4 0.0194(6) 0.0221(6) 0.0234(6) 0.0000(5) 0.0022(5) -0.0005(5)
C4 0.0229(8) 0.0291(8) 0.0251(8) -0.0020(6) 0.0052(6) 0.0014(6)
N5 0.0221(6) 0.0255(6) 0.0207(6) 0.0025(5) 0.0033(5) 0.0016(5)
C5 0.0227(8) 0.0500(11) 0.0355(10) -0.0083(8) 0.0007(7) 0.0067(8)
C6 0.0239(8) 0.0312(8) 0.0236(8) -0.0002(6) 0.0043(6) -0.0020(6)
C7 0.0414(10) 0.0292(9) 0.0333(9) 0.0065(7) 0.0036(8) 0.0003(8)
C8 0.0213(8) 0.0322(9) 0.0287(8) 0.0014(7) -0.0032(6) -0.0033(6)
C9 0.0295(9) 0.0541(12) 0.0309(9) 0.0094(8) -0.0047(7) 0.0005(8)
C10 0.0310(9) 0.0207(8) 0.0381(9) -0.0012(7) 0.0045(7) -0.0015(7)
C11 0.0443(11) 0.0260(9) 0.0531(12) -0.0011(8) 0.0121(9) 0.0079(8)
C12 0.0297(9) 0.0417(10) 0.0202(8) 0.0001(7) 0.0045(7) 0.0014(7)
C13 0.0400(11) 0.0756(15) 0.0250(9) -0.0004(9) -0.0035(8) 0.0031(11)
C14 0.0197(7) 0.0322(9) 0.0261(8) 0.0033(6) 0.0042(6) -0.0004(6)
C15 0.0322(9) 0.0304(9) 0.0482(11) 0.0004(8) 0.0045(8) -0.0047(7)
C16 0.0237(8) 0.0305(8) 0.0244(8) 0.0008(6) -0.0003(6) -0.0014(6)
C17 0.0308(10) 0.0446(11) 0.0464(11) 0.0014(9) 0.0035(8) -0.0116(8)
C18 0.0408(10) 0.0269(9) 0.0375(10) 0.0092(7) 0.0050(8) 0.0098(8)
C19 0.0518(12) 0.0262(9) 0.0507(12) -0.0009(8) 0.0123(10) 0.0092(8)
 
_geom_special_details
;
 All esds (except the esd in the dihedral angle between two l.s. planes)
 are estimated using the full covariance matrix.  The cell esds are taken
 into account individually in the estimation of esds in distances, angles
 and torsion angles; correlations between esds in cell parameters are only
 used when they are defined by crystal symmetry.  An approximate (isotropic)
 treatment of cell esds is used for estimating esds involving l.s. planes.
;
 
loop_
 _geom_bond_atom_site_label_1
 _geom_bond_atom_site_label_2
 _geom_bond_distance
 _geom_bond_site_symmetry_2
 _geom_bond_publ_flag
Pd1 C1 1.9956(18) . ?
Pd1 C3 2.0001(18) . ?
Pd1 C2 2.0529(18) . ?
N1 C1 1.150(2) . ?
N2 C2 1.150(2) . ?
C3 N3 1.149(2) . ?
N4 C10 1.514(2) . ?
N4 C6 1.518(2) . ?
N4 C8 1.518(2) . ?
N4 C4 1.5247(19) . ?
C4 C5 1.511(2) . ?
N5 C18 1.514(2) . ?
N5 C12 1.516(2) . ?
N5 C16 1.519(2) . ?
N5 C14 1.5231(19) . ?
C6 C7 1.512(2) . ?
C8 C9 1.519(2) . ?
C10 C11 1.522(2) . ?
C12 C13 1.517(3) . ?
C14 C15 1.518(2) . ?
C16 C17 1.516(2) . ?
C18 C19 1.517(3) . ?
 
loop_
 _geom_angle_atom_site_label_1
 _geom_angle_atom_site_label_2
 _geom_angle_atom_site_label_3
 _geom_angle
 _geom_angle_site_symmetry_1
 _geom_angle_site_symmetry_3
 _geom_angle_publ_flag
C1 Pd1 C3 174.98(7) . . ?
C1 Pd1 C2 93.11(7) . . ?
C3 Pd1 C2 91.91(6) . . ?
N1 C1 Pd1 178.52(18) . . ?
N2 C2 Pd1 178.04(14) . . ?
N3 C3 Pd1 178.60(15) . . ?
C10 N4 C6 108.30(12) . . ?
C10 N4 C8 112.02(12) . . ?
C6 N4 C8 108.99(12) . . ?
C10 N4 C4 108.51(12) . . ?
C6 N4 C4 111.45(12) . . ?
C8 N4 C4 107.60(12) . . ?
C5 C4 N4 115.18(13) . . ?
C18 N5 C12 108.48(13) . . ?
C18 N5 C16 111.67(13) . . ?
C12 N5 C16 109.08(12) . . ?
C18 N5 C14 108.29(12) . . ?
C12 N5 C14 111.86(13) . . ?
C16 N5 C14 107.50(12) . . ?
C7 C6 N4 115.79(13) . . ?
N4 C8 C9 115.04(13) . . ?
N4 C10 C11 114.71(14) . . ?
N5 C12 C13 114.86(14) . . ?
C15 C14 N5 114.62(13) . . ?
C17 C16 N5 115.36(14) . . ?
N5 C18 C19 114.96(14) . . ?
 
loop_
 _geom_torsion_atom_site_label_1
 _geom_torsion_atom_site_label_2
 _geom_torsion_atom_site_label_3
 _geom_torsion_atom_site_label_4
 _geom_torsion
 _geom_torsion_site_symmetry_1
 _geom_torsion_site_symmetry_2
 _geom_torsion_site_symmetry_3
 _geom_torsion_site_symmetry_4
 _geom_torsion_publ_flag
C3 Pd1 C1 N1 156(6) . . . . ?
C2 Pd1 C1 N1 -24(6) . . . . ?
C1 Pd1 C2 N2 159(4) . . . . ?
C3 Pd1 C2 N2 -21(4) . . . . ?
C1 Pd1 C3 N3 141(6) . . . . ?
C2 Pd1 C3 N3 -39(7) . . . . ?
C10 N4 C4 C5 56.96(18) . . . . ?
C6 N4 C4 C5 -62.21(18) . . . . ?
C8 N4 C4 C5 178.36(14) . . . . ?
C10 N4 C6 C7 -176.68(14) . . . . ?
C8 N4 C6 C7 61.21(17) . . . . ?
C4 N4 C6 C7 -57.39(18) . . . . ?
C10 N4 C8 C9 51.58(19) . . . . ?
C6 N4 C8 C9 171.41(14) . . . . ?
C4 N4 C8 C9 -67.60(18) . . . . ?
C6 N4 C10 C11 -66.69(18) . . . . ?
C8 N4 C10 C11 53.54(19) . . . . ?
C4 N4 C10 C11 172.18(15) . . . . ?
C18 N5 C12 C13 61.5(2) . . . . ?
C16 N5 C12 C13 -176.65(16) . . . . ?
C14 N5 C12 C13 -57.9(2) . . . . ?
C18 N5 C14 C15 -171.05(15) . . . . ?
C12 N5 C14 C15 -51.57(19) . . . . ?
C16 N5 C14 C15 68.15(18) . . . . ?
C18 N5 C16 C17 57.83(18) . . . . ?
C12 N5 C16 C17 -62.05(19) . . . . ?
C14 N5 C16 C17 176.47(14) . . . . ?
C12 N5 C18 C19 170.33(15) . . . . ?
C16 N5 C18 C19 50.1(2) . . . . ?
C14 N5 C18 C19 -68.08(19) . . . . ?
 
_diffrn_measured_fraction_theta_max    0.997
_diffrn_reflns_theta_full              28.32
_diffrn_measured_fraction_theta_full   0.997
_refine_diff_density_max    0.313
_refine_diff_density_min   -0.427
_refine_diff_density_rms    0.061
#===END

data_06271
 
_audit_creation_method            SHELXL-97
_chemical_name_systematic
;
 ?
;
_chemical_name_common             ?
_chemical_melting_point           ?
_chemical_formula_moiety          ?
_chemical_formula_sum
 'C35 H47 K N O9 P Pd'
_chemical_formula_weight          802.21
 
loop_
 _atom_type_symbol
 _atom_type_description
 _atom_type_scat_dispersion_real
 _atom_type_scat_dispersion_imag
 _atom_type_scat_source
 'C'  'C'   0.0033   0.0016
 'International Tables Vol C Tables 4.2.6.8 and 6.1.1.4'
 'K'  'K'   0.2009   0.2494
 'International Tables Vol C Tables 4.2.6.8 and 6.1.1.4'
 'N'  'N'   0.0061   0.0033
 'International Tables Vol C Tables 4.2.6.8 and 6.1.1.4'
 'O'  'O'   0.0106   0.0060
 'International Tables Vol C Tables 4.2.6.8 and 6.1.1.4'
 'P'  'P'   0.1023   0.0942
 'International Tables Vol C Tables 4.2.6.8 and 6.1.1.4'
 'Pd'  'Pd'  -0.9988   1.0072
 'International Tables Vol C Tables 4.2.6.8 and 6.1.1.4'
 'H'  'H'   0.0000   0.0000
 'International Tables Vol C Tables 4.2.6.8 and 6.1.1.4'
 
_symmetry_cell_setting            Monoclinic
_symmetry_space_group_name_H-M    P2(1)/c
 
loop_
 _symmetry_equiv_pos_as_xyz
 'x, y, z'
 '-x, y+1/2, -z+1/2'
 '-x, -y, -z'
 'x, -y-1/2, z-1/2'
 
_cell_length_a                    11.550(3)
_cell_length_b                    8.4259(19)
_cell_length_c                    38.732(8)
_cell_angle_alpha                 90.00
_cell_angle_beta                  96.543(4)
_cell_angle_gamma                 90.00
_cell_volume                      3744.8(15)
_cell_formula_units_Z             4
_cell_measurement_temperature     293(2)
_cell_measurement_reflns_used     ?
_cell_measurement_theta_min       ?
_cell_measurement_theta_max       ?
 
_exptl_crystal_description        needle
_exptl_crystal_colour             colourless
_exptl_crystal_size_min           0.020
_exptl_crystal_size_mid           0.080
_exptl_crystal_size_max           0.380
_exptl_crystal_density_meas       ?
_exptl_crystal_density_diffrn     1.423
_exptl_crystal_density_method     'not measured'
_exptl_crystal_F_000              1664
_exptl_absorpt_coefficient_mu     0.701
_exptl_absorpt_correction_type    none
_exptl_absorpt_correction_T_min   ?
_exptl_absorpt_correction_T_max   ?
_exptl_absorpt_process_details    ?
 
_exptl_special_details
;
 ?
;
 
_diffrn_ambient_temperature       293(2)
_diffrn_radiation_wavelength      0.71073
_diffrn_radiation_type            MoK\a
_diffrn_radiation_source          'fine-focus sealed tube'
_diffrn_radiation_monochromator   graphite
_diffrn_measurement_device_type   'Bruker P4'
_diffrn_measurement_method        '\w scans'
_diffrn_detector_area_resol_mean  ?
_diffrn_standards_number          ?
_diffrn_standards_interval_count  ?
_diffrn_standards_interval_time   ?
_diffrn_standards_decay_%         ?
_diffrn_reflns_number             35613
_diffrn_reflns_av_R_equivalents   0.0915
_diffrn_reflns_av_sigmaI/netI     0.0817
_diffrn_reflns_limit_h_min        -14
_diffrn_reflns_limit_h_max        14
_diffrn_reflns_limit_k_min        -9
_diffrn_reflns_limit_k_max        10
_diffrn_reflns_limit_l_min        -49
_diffrn_reflns_limit_l_max        49
_diffrn_reflns_theta_min          1.77
_diffrn_reflns_theta_max          27.18
_reflns_number_total              8311
_reflns_number_gt                 4952
_reflns_threshold_expression      >2sigma(I)
 
_computing_data_collection        'Bruker XSCANS'
_computing_cell_refinement        'Bruker XSCANS'
_computing_data_reduction         'Bruker SHELXTL'
_computing_structure_solution     'SHELXS-97 (Sheldrick, 1990)'
_computing_structure_refinement   'SHELXL-97 (Sheldrick, 1997)'
_computing_molecular_graphics     'Bruker SHELXTL'
_computing_publication_material   'Bruker SHELXTL'
 
_refine_special_details
;
 Refinement of F^2^ against ALL reflections.  The weighted R-factor wR and
 goodness of fit S are based on F^2^, conventional R-factors R are based
 on F, with F set to zero for negative F^2^. The threshold expression of
 F^2^ > 2sigma(F^2^) is used only for calculating R-factors(gt) etc. and is
 not relevant to the choice of reflections for refinement.  R-factors based
 on F^2^ are statistically about twice as large as those based on F, and R-
 factors based on ALL data will be even larger.
;
 
_refine_ls_structure_factor_coef  Fsqd
_refine_ls_matrix_type            full
_refine_ls_weighting_scheme       calc
_refine_ls_weighting_details
 'calc w=1/[\s^2^(Fo^2^)+(0.0492P)^2^+0.8355P] where P=(Fo^2^+2Fc^2^)/3'
_atom_sites_solution_primary      direct
_atom_sites_solution_secondary    difmap
_atom_sites_solution_hydrogens    geom
_refine_ls_hydrogen_treatment     riding
_refine_ls_extinction_method      none
_refine_ls_extinction_coef        ?
_refine_ls_number_reflns          8311
_refine_ls_number_parameters      421
_refine_ls_number_restraints      126
_refine_ls_R_factor_all           0.1056
_refine_ls_R_factor_gt            0.0536
_refine_ls_wR_factor_ref          0.1313
_refine_ls_wR_factor_gt           0.1112
_refine_ls_goodness_of_fit_ref    1.057
_refine_ls_restrained_S_all       1.064
_refine_ls_shift/su_max           0.001
_refine_ls_shift/su_mean          0.000
 
loop_
 _atom_site_label
 _atom_site_type_symbol
 _atom_site_fract_x
 _atom_site_fract_y
 _atom_site_fract_z
 _atom_site_U_iso_or_equiv
 _atom_site_adp_type
 _atom_site_occupancy
 _atom_site_symmetry_multiplicity
 _atom_site_calc_flag
 _atom_site_refinement_flags
 _atom_site_disorder_assembly
 _atom_site_disorder_group
Pd1 Pd 0.48298(3) 0.24259(4) 0.361286(8) 0.03176(11) Uani 1 1 d . . .
P1 P 0.48950(10) 0.34906(14) 0.41483(3) 0.0299(3) Uani 1 1 d . B .
O2 O 0.4042(3) 0.1305(4) 0.31900(7) 0.0403(8) Uani 1 1 d . B .
O1 O 0.3279(3) 0.1479(4) 0.34574(7) 0.0411(8) Uani 1 1 d . B .
N2 N 0.7427(4) 0.3298(6) 0.35319(12) 0.0648(13) Uani 1 1 d . . .
C2 C 0.6462(5) 0.3014(6) 0.35611(12) 0.0482(13) Uani 1 1 d . B .
C3 C 0.5966(4) 0.2695(5) 0.44858(10) 0.0324(10) Uani 1 1 d . . .
C4 C 0.7125(4) 0.2594(6) 0.44214(13) 0.0509(13) Uani 1 1 d . B .
H4A H 0.7344 0.2959 0.4212 0.061 Uiso 1 1 calc R . .
C5 C 0.7952(5) 0.1953(8) 0.46686(16) 0.0697(18) Uani 1 1 d . . .
H5A H 0.8724 0.1882 0.4623 0.084 Uiso 1 1 calc R B .
C6 C 0.7642(5) 0.1416(7) 0.49831(15) 0.0628(16) Uani 1 1 d . B .
H6A H 0.8204 0.0993 0.5149 0.075 Uiso 1 1 calc R . .
C7 C 0.6507(5) 0.1511(6) 0.50493(12) 0.0493(13) Uani 1 1 d . . .
H7A H 0.6295 0.1153 0.5260 0.059 Uiso 1 1 calc R B .
C8 C 0.5668(4) 0.2142(5) 0.48014(11) 0.0399(12) Uani 1 1 d . B .
H8A H 0.4896 0.2194 0.4848 0.048 Uiso 1 1 calc R . .
C9 C 0.5180(4) 0.5613(5) 0.41565(11) 0.0318(10) Uani 1 1 d . . .
C10 C 0.5810(4) 0.6381(5) 0.44348(11) 0.0363(11) Uani 1 1 d . B .
H10A H 0.6099 0.5805 0.4631 0.044 Uiso 1 1 calc R . .
C11 C 0.6007(4) 0.7983(6) 0.44214(13) 0.0456(13) Uani 1 1 d . . .
H11A H 0.6436 0.8493 0.4607 0.055 Uiso 1 1 calc R B .
C12 C 0.5567(5) 0.8839(6) 0.41321(14) 0.0501(13) Uani 1 1 d . B .
H12A H 0.5707 0.9924 0.4123 0.060 Uiso 1 1 calc R . .
C13 C 0.4930(5) 0.8109(6) 0.38589(14) 0.0543(15) Uani 1 1 d . . .
H13A H 0.4625 0.8697 0.3666 0.065 Uiso 1 1 calc R B .
C14 C 0.4740(4) 0.6482(6) 0.38701(12) 0.0455(12) Uani 1 1 d . B .
H14A H 0.4314 0.5978 0.3683 0.055 Uiso 1 1 calc R . .
C15 C 0.3520(4) 0.3279(6) 0.43335(11) 0.0351(10) Uani 1 1 d . . .
C16 C 0.3129(4) 0.4414(6) 0.45561(12) 0.0475(13) Uani 1 1 d . B .
H16A H 0.3563 0.5331 0.4607 0.057 Uiso 1 1 calc R . .
C17 C 0.2107(5) 0.4187(8) 0.46998(14) 0.0625(16) Uani 1 1 d . . .
H17A H 0.1859 0.4938 0.4851 0.075 Uiso 1 1 calc R B .
C18 C 0.1457(5) 0.2851(9) 0.46194(15) 0.0691(19) Uani 1 1 d . B .
H18A H 0.0764 0.2702 0.4716 0.083 Uiso 1 1 calc R . .
C19 C 0.1817(5) 0.1728(8) 0.43968(14) 0.0617(16) Uani 1 1 d . . .
H19A H 0.1361 0.0833 0.4342 0.074 Uiso 1 1 calc R B .
C20 C 0.2852(4) 0.1924(6) 0.42546(12) 0.0438(12) Uani 1 1 d . B .
H20A H 0.3100 0.1156 0.4107 0.053 Uiso 1 1 calc R . .
O21 O 0.0788(7) 0.0868(10) 0.2754(2) 0.046(2) Uiso 0.415(5) 1 d PD A 1
C22 C 0.0455(13) 0.0218(18) 0.2429(3) 0.047(4) Uiso 0.415(5) 1 d PD A 1
H22A H -0.0179 0.0825 0.2308 0.057 Uiso 0.415(5) 1 calc PR A 1
H22B H 0.0196 -0.0868 0.2452 0.057 Uiso 0.415(5) 1 calc PR A 1
C23 C 0.1526(12) 0.0268(16) 0.2227(4) 0.073(5) Uiso 0.415(5) 1 d PD A 1
H23A H 0.2162 -0.0319 0.2353 0.088 Uiso 0.415(5) 1 calc PR A 1
H23B H 0.1338 -0.0230 0.2001 0.088 Uiso 0.415(5) 1 calc PR A 1
O24 O 0.1875(8) 0.1865(11) 0.2181(2) 0.050(2) Uiso 0.415(5) 1 d PD A 1
C25 C 0.2860(12) 0.1865(17) 0.2011(4) 0.062(4) Uiso 0.415(5) 1 d PD A 1
H25A H 0.2701 0.1349 0.1787 0.074 Uiso 0.415(5) 1 calc PR A 1
H25B H 0.3484 0.1293 0.2147 0.074 Uiso 0.415(5) 1 calc PR A 1
C26 C 0.3214(14) 0.3571(17) 0.1964(4) 0.072(4) Uiso 0.415(5) 1 d PD A 1
H26A H 0.3884 0.3609 0.1834 0.087 Uiso 0.415(5) 1 calc PR A 1
H26B H 0.2580 0.4142 0.1833 0.087 Uiso 0.415(5) 1 calc PR A 1
O27 O 0.3493(9) 0.4294(14) 0.2291(3) 0.070(3) Uiso 0.415(5) 1 d PD A 1
C28 C 0.3719(16) 0.5895(18) 0.2229(4) 0.079(5) Uiso 0.415(5) 1 d PD A 1
H28A H 0.3075 0.6340 0.2077 0.095 Uiso 0.415(5) 1 calc PR A 1
H28B H 0.4417 0.5981 0.2113 0.095 Uiso 0.415(5) 1 calc PR A 1
C29 C 0.3876(15) 0.679(3) 0.2553(4) 0.105(7) Uiso 0.415(5) 1 d PD A 1
H29A H 0.4518 0.6346 0.2705 0.126 Uiso 0.415(5) 1 calc PR A 1
H29B H 0.4073 0.7884 0.2504 0.126 Uiso 0.415(5) 1 calc PR A 1
O30 O 0.2867(9) 0.6772(13) 0.2721(3) 0.059(3) Uiso 0.415(5) 1 d PD A 1
C31 C 0.3072(12) 0.7619(16) 0.3027(3) 0.050(3) Uiso 0.415(5) 1 d PD A 1
H31A H 0.3177 0.8732 0.2975 0.060 Uiso 0.415(5) 1 calc PR A 1
H31B H 0.3782 0.7239 0.3159 0.060 Uiso 0.415(5) 1 calc PR A 1
C32 C 0.2082(12) 0.7438(15) 0.3237(4) 0.056(3) Uiso 0.415(5) 1 d PD A 1
H32A H 0.2239 0.8057 0.3449 0.067 Uiso 0.415(5) 1 calc PR A 1
H32B H 0.1382 0.7860 0.3107 0.067 Uiso 0.415(5) 1 calc PR A 1
O33 O 0.1885(8) 0.5853(11) 0.3325(2) 0.050(3) Uiso 0.415(5) 1 d PD A 1
C34 C 0.0948(12) 0.5617(16) 0.3517(4) 0.063(4) Uiso 0.415(5) 1 d PD A 1
H34A H 0.0249 0.6075 0.3394 0.075 Uiso 0.415(5) 1 calc PR A 1
H34B H 0.1100 0.6147 0.3740 0.075 Uiso 0.415(5) 1 calc PR A 1
C35 C 0.0765(14) 0.3894(15) 0.3572(4) 0.063(4) Uiso 0.415(5) 1 d PD A 1
H35A H 0.1466 0.3440 0.3695 0.075 Uiso 0.415(5) 1 calc PR A 1
H35B H 0.0136 0.3751 0.3715 0.075 Uiso 0.415(5) 1 calc PR A 1
O36 O 0.0494(7) 0.3100(11) 0.3256(2) 0.042(2) Uiso 0.415(5) 1 d PD A 1
C37 C 0.0204(15) 0.1532(16) 0.3309(4) 0.064(4) Uiso 0.415(5) 1 d PD A 1
H37A H -0.0427 0.1472 0.3454 0.077 Uiso 0.415(5) 1 calc PR A 1
H37B H 0.0870 0.0964 0.3424 0.077 Uiso 0.415(5) 1 calc PR A 1
C38 C -0.0168(12) 0.0814(19) 0.2955(3) 0.065(4) Uiso 0.415(5) 1 d PD A 1
H38A H -0.0412 -0.0277 0.2982 0.078 Uiso 0.415(5) 1 calc PR A 1
H38B H -0.0821 0.1403 0.2839 0.078 Uiso 0.415(5) 1 calc PR A 1
O21' O 0.0495(6) 0.1188(8) 0.29419(16) 0.0512(17) Uiso 0.585(5) 1 d PD A 2
C22' C -0.0050(9) 0.0475(13) 0.2643(2) 0.064(3) Uiso 0.585(5) 1 d PD A 2
H22C H -0.0641 0.1184 0.2532 0.076 Uiso 0.585(5) 1 calc PR A 2
H22D H -0.0433 -0.0492 0.2705 0.076 Uiso 0.585(5) 1 calc PR A 2
C23' C 0.0831(10) 0.0085(13) 0.2390(3) 0.061(4) Uiso 0.585(5) 1 d PD A 2
H23C H 0.1413 -0.0644 0.2498 0.073 Uiso 0.585(5) 1 calc PR A 2
H23D H 0.0436 -0.0425 0.2184 0.073 Uiso 0.585(5) 1 calc PR A 2
O24' O 0.1365(5) 0.1455(8) 0.22953(15) 0.0473(16) Uiso 0.585(5) 1 d PD A 2
C25' C 0.2287(9) 0.1082(12) 0.2108(3) 0.060(3) Uiso 0.585(5) 1 d PD A 2
H25C H 0.2017 0.0362 0.1920 0.072 Uiso 0.585(5) 1 calc PR A 2
H25D H 0.2894 0.0548 0.2258 0.072 Uiso 0.585(5) 1 calc PR A 2
C26' C 0.2788(8) 0.2584(12) 0.1957(2) 0.046(2) Uiso 0.585(5) 1 d PD A 2
H26C H 0.3418 0.2304 0.1823 0.055 Uiso 0.585(5) 1 calc PR A 2
H26D H 0.2187 0.3119 0.1804 0.055 Uiso 0.585(5) 1 calc PR A 2
O27' O 0.3199(5) 0.3582(8) 0.22293(16) 0.0474(17) Uiso 0.585(5) 1 d PD A 2
C28' C 0.3544(8) 0.5043(11) 0.2102(2) 0.052(2) Uiso 0.585(5) 1 d PD A 2
H28C H 0.2879 0.5574 0.1977 0.062 Uiso 0.585(5) 1 calc PR A 2
H28D H 0.4123 0.4874 0.1943 0.062 Uiso 0.585(5) 1 calc PR A 2
C29' C 0.4060(7) 0.6075(11) 0.2409(2) 0.048(2) Uiso 0.585(5) 1 d PD A 2
H29C H 0.4694 0.5519 0.2544 0.057 Uiso 0.585(5) 1 calc PR A 2
H29D H 0.4361 0.7060 0.2325 0.057 Uiso 0.585(5) 1 calc PR A 2
O30' O 0.3151(6) 0.6393(8) 0.26174(16) 0.0462(17) Uiso 0.585(5) 1 d PD A 2
C31' C 0.3525(8) 0.7452(11) 0.2893(2) 0.049(2) Uiso 0.585(5) 1 d PD A 2
H31C H 0.3737 0.8464 0.2799 0.059 Uiso 0.585(5) 1 calc PR A 2
H31D H 0.4207 0.7021 0.3031 0.059 Uiso 0.585(5) 1 calc PR A 2
C32' C 0.2561(8) 0.7690(10) 0.3119(2) 0.038(2) Uiso 0.585(5) 1 d PD A 2
H32C H 0.2797 0.8453 0.3301 0.045 Uiso 0.585(5) 1 calc PR A 2
H32D H 0.1866 0.8085 0.2982 0.045 Uiso 0.585(5) 1 calc PR A 2
O33' O 0.2335(5) 0.6186(7) 0.32665(14) 0.0384(15) Uiso 0.585(5) 1 d PD A 2
C34' C 0.1525(8) 0.6335(11) 0.3516(2) 0.056(3) Uiso 0.585(5) 1 d PD A 2
H34C H 0.0805 0.6806 0.3410 0.067 Uiso 0.585(5) 1 calc PR A 2
H34D H 0.1844 0.7013 0.3706 0.067 Uiso 0.585(5) 1 calc PR A 2
C35' C 0.1296(8) 0.4725(11) 0.3649(2) 0.053(3) Uiso 0.585(5) 1 d PD A 2
H35C H 0.2028 0.4209 0.3730 0.064 Uiso 0.585(5) 1 calc PR A 2
H35D H 0.0837 0.4804 0.3843 0.064 Uiso 0.585(5) 1 calc PR A 2
O36' O 0.0684(5) 0.3815(7) 0.33784(18) 0.0456(16) Uiso 0.585(5) 1 d PD A 2
C37' C 0.0386(8) 0.2294(10) 0.3498(2) 0.052(2) Uiso 0.585(5) 1 d PD A 2
H37C H -0.0114 0.2397 0.3681 0.062 Uiso 0.585(5) 1 calc PR A 2
H37D H 0.1083 0.1721 0.3589 0.062 Uiso 0.585(5) 1 calc PR A 2
C38' C -0.0240(8) 0.1419(12) 0.3194(2) 0.053(3) Uiso 0.585(5) 1 d PD A 2
H38C H -0.0509 0.0401 0.3270 0.063 Uiso 0.585(5) 1 calc PR A 2
H38D H -0.0915 0.2025 0.3098 0.063 Uiso 0.585(5) 1 calc PR A 2
K1 K 0.24069(9) 0.33048(12) 0.28872(2) 0.0369(2) Uani 1 1 d . B 3
C44 C 0.1475(6) 1.2009(9) 0.10379(16) 0.081(2) Uani 1 1 d . . .
H44A H 0.2320 1.1971 0.1067 0.097 Uiso 1 1 calc R . .
H44B H 0.1186 1.1489 0.1234 0.097 Uiso 1 1 calc R . .
C43 C 0.1000(6) 1.1268(8) 0.07097(17) 0.079(2) Uani 1 1 d . . .
H43A H 0.1624 1.0910 0.0581 0.094 Uiso 1 1 calc R . .
H43B H 0.0516 1.0364 0.0753 0.094 Uiso 1 1 calc R . .
C42 C 0.0345(10) 1.2428(13) 0.0527(3) 0.171(6) Uani 1 1 d . . .
H42A H 0.0685 1.2644 0.0314 0.205 Uiso 1 1 calc R . .
H42B H -0.0434 1.2018 0.0462 0.205 Uiso 1 1 calc R . .
O41 O 0.0265(6) 1.3731(8) 0.0689(3) 0.159(3) Uani 1 1 d . . .
C45 C 0.1051(8) 1.3673(11) 0.1002(2) 0.120(3) Uani 1 1 d . . .
H45A H 0.0652 1.3967 0.1200 0.144 Uiso 1 1 calc R . .
H45B H 0.1697 1.4396 0.0989 0.144 Uiso 1 1 calc R . .
 
loop_
 _atom_site_aniso_label
 _atom_site_aniso_U_11
 _atom_site_aniso_U_22
 _atom_site_aniso_U_33
 _atom_site_aniso_U_23
 _atom_site_aniso_U_13
 _atom_site_aniso_U_12
Pd1 0.0389(2) 0.02552(19) 0.02986(17) -0.00102(16) -0.00057(13) -0.00140(17)
P1 0.0341(6) 0.0255(6) 0.0289(6) 0.0014(5) -0.0015(5) -0.0032(5)
O2 0.0418(18) 0.045(2) 0.0331(16) -0.0095(15) 0.0010(14) 0.0009(16)
O1 0.0404(18) 0.045(2) 0.0374(17) -0.0077(16) 0.0012(15) 0.0008(16)
N2 0.061(3) 0.079(4) 0.057(3) -0.005(3) 0.017(3) -0.016(3)
C2 0.057(3) 0.048(3) 0.040(3) -0.007(2) 0.008(3) -0.010(3)
C3 0.042(3) 0.022(2) 0.031(2) -0.0028(19) -0.0044(19) -0.005(2)
C4 0.036(3) 0.062(4) 0.053(3) 0.012(3) -0.003(2) -0.006(3)
C5 0.035(3) 0.091(5) 0.078(4) 0.024(4) -0.013(3) 0.001(3)
C6 0.061(4) 0.060(4) 0.060(4) 0.013(3) -0.024(3) -0.003(3)
C7 0.062(4) 0.047(3) 0.036(3) 0.013(2) -0.007(2) -0.004(3)
C8 0.050(3) 0.032(3) 0.036(2) 0.004(2) -0.005(2) 0.006(2)
C9 0.036(3) 0.026(2) 0.033(2) -0.002(2) 0.004(2) -0.002(2)
C10 0.045(3) 0.028(3) 0.035(2) -0.002(2) -0.001(2) -0.004(2)
C11 0.051(3) 0.034(3) 0.051(3) -0.011(2) -0.001(2) -0.009(2)
C12 0.065(4) 0.019(3) 0.065(3) -0.005(3) 0.004(3) -0.004(2)
C13 0.078(4) 0.027(3) 0.054(3) 0.008(2) -0.010(3) 0.003(3)
C14 0.057(3) 0.030(3) 0.047(3) -0.003(2) -0.009(2) -0.005(2)
C15 0.034(3) 0.040(3) 0.031(2) 0.007(2) 0.0000(19) -0.003(2)
C16 0.045(3) 0.051(3) 0.046(3) 0.002(3) 0.003(2) -0.002(3)
C17 0.045(3) 0.086(5) 0.058(3) -0.001(3) 0.014(3) 0.004(3)
C18 0.042(3) 0.104(6) 0.060(4) 0.021(4) 0.006(3) -0.005(4)
C19 0.057(4) 0.072(4) 0.054(3) 0.023(3) -0.002(3) -0.031(3)
C20 0.046(3) 0.044(3) 0.039(3) 0.010(2) -0.003(2) -0.016(2)
K1 0.0381(6) 0.0370(6) 0.0345(5) 0.0005(5) -0.0003(4) -0.0033(5)
C44 0.061(4) 0.119(7) 0.063(4) 0.009(4) 0.009(3) -0.007(4)
C43 0.066(4) 0.083(5) 0.088(5) -0.013(4) 0.015(4) 0.000(4)
C42 0.207(12) 0.157(10) 0.121(7) -0.041(7) -0.095(8) 0.106(9)
O41 0.122(5) 0.099(5) 0.242(9) -0.001(6) -0.034(6) 0.047(4)
C45 0.122(7) 0.099(7) 0.139(8) -0.069(6) 0.008(6) 0.005(6)
 
_geom_special_details
;
 All esds (except the esd in the dihedral angle between two l.s. planes)
 are estimated using the full covariance matrix.  The cell esds are taken
 into account individually in the estimation of esds in distances, angles
 and torsion angles; correlations between esds in cell parameters are only
 used when they are defined by crystal symmetry.  An approximate (isotropic)
 treatment of cell esds is used for estimating esds involving l.s. planes.
;
 
loop_
 _geom_bond_atom_site_label_1
 _geom_bond_atom_site_label_2
 _geom_bond_distance
 _geom_bond_site_symmetry_2
 _geom_bond_publ_flag
Pd1 C2 1.981(6) . ?
Pd1 O1 1.990(3) . ?
Pd1 O2 2.016(3) . ?
Pd1 P1 2.2530(12) . ?
Pd1 K1 3.8062(12) . ?
P1 C9 1.818(4) . ?
P1 C3 1.822(4) . ?
P1 C15 1.824(4) . ?
O2 O1 1.441(4) . ?
O2 K1 2.697(3) . ?
O1 K1 2.784(3) . ?
N2 C2 1.158(6) . ?
C3 C8 1.388(6) . ?
C3 C4 1.392(6) . ?
C4 C5 1.383(7) . ?
C5 C6 1.385(8) . ?
C6 C7 1.367(7) . ?
C7 C8 1.389(6) . ?
C9 C14 1.377(6) . ?
C9 C10 1.389(6) . ?
C10 C11 1.372(6) . ?
C11 C12 1.380(7) . ?
C12 C13 1.364(7) . ?
C13 C14 1.390(7) . ?
C15 C20 1.392(6) . ?
C15 C16 1.397(6) . ?
C16 C17 1.374(7) . ?
C17 C18 1.369(8) . ?
C18 C19 1.376(8) . ?
C19 C20 1.382(7) . ?
O21 C22 1.387(12) . ?
O21 C38 1.424(13) . ?
C22 C23 1.538(13) . ?
C23 O24 1.421(13) . ?
O24 C25 1.378(12) . ?
C25 C26 1.512(13) . ?
C26 O27 1.410(13) . ?
O27 C28 1.399(13) . ?
C28 C29 1.458(13) . ?
C29 O30 1.399(14) . ?
O30 C31 1.381(12) . ?
C31 C32 1.485(12) . ?
C32 O33 1.404(12) . ?
O33 C34 1.393(12) . ?
C34 C35 1.486(13) . ?
C35 O36 1.399(12) . ?
O36 C37 1.384(13) . ?
C37 C38 1.515(13) . ?
O21' C38' 1.378(9) . ?
O21' C22' 1.389(10) . ?
C22' C23' 1.529(11) . ?
C23' O24' 1.378(10) . ?
O24' C25' 1.393(10) . ?
C25' C26' 1.534(11) . ?
C26' O27' 1.390(9) . ?
O27' C28' 1.401(10) . ?
C28' C29' 1.538(10) . ?
C29' O30' 1.421(10) . ?
O30' C31' 1.420(9) . ?
C31' C32' 1.507(10) . ?
C32' O33' 1.426(9) . ?
O33' C34' 1.427(9) . ?
C34' C35' 1.485(10) . ?
C35' O36' 1.420(9) . ?
O36' C37' 1.418(9) . ?
C37' C38' 1.503(10) . ?
C44 C43 1.466(8) . ?
C44 C45 1.486(10) . ?
C43 C42 1.382(10) . ?
C42 O41 1.273(9) . ?
O41 C45 1.432(10) . ?
 
loop_
 _geom_angle_atom_site_label_1
 _geom_angle_atom_site_label_2
 _geom_angle_atom_site_label_3
 _geom_angle
 _geom_angle_site_symmetry_1
 _geom_angle_site_symmetry_3
 _geom_angle_publ_flag
C2 Pd1 O1 154.62(16) . . ?
C2 Pd1 O2 112.45(16) . . ?
O1 Pd1 O2 42.17(11) . . ?
C2 Pd1 P1 93.51(14) . . ?
O1 Pd1 P1 111.88(9) . . ?
O2 Pd1 P1 154.04(9) . . ?
C2 Pd1 K1 120.30(15) . . ?
O1 Pd1 K1 45.09(9) . . ?
O2 Pd1 K1 42.71(9) . . ?
P1 Pd1 K1 123.15(4) . . ?
C9 P1 C3 104.0(2) . . ?
C9 P1 C15 104.7(2) . . ?
C3 P1 C15 103.4(2) . . ?
C9 P1 Pd1 113.25(14) . . ?
C3 P1 Pd1 117.56(14) . . ?
C15 P1 Pd1 112.57(15) . . ?
O1 O2 Pd1 67.95(16) . . ?
O1 O2 K1 78.13(17) . . ?
Pd1 O2 K1 106.83(12) . . ?
O2 O1 Pd1 69.88(17) . . ?
O2 O1 K1 71.44(17) . . ?
Pd1 O1 K1 104.50(13) . . ?
N2 C2 Pd1 177.4(5) . . ?
C8 C3 C4 118.5(4) . . ?
C8 C3 P1 122.6(4) . . ?
C4 C3 P1 118.8(3) . . ?
C5 C4 C3 120.2(5) . . ?
C4 C5 C6 120.6(5) . . ?
C7 C6 C5 119.7(5) . . ?
C6 C7 C8 120.0(5) . . ?
C3 C8 C7 120.9(5) . . ?
C14 C9 C10 119.4(4) . . ?
C14 C9 P1 117.3(3) . . ?
C10 C9 P1 123.3(3) . . ?
C11 C10 C9 120.2(4) . . ?
C10 C11 C12 119.9(4) . . ?
C13 C12 C11 120.7(5) . . ?
C12 C13 C14 119.6(5) . . ?
C9 C14 C13 120.3(4) . . ?
C20 C15 C16 119.1(4) . . ?
C20 C15 P1 118.7(4) . . ?
C16 C15 P1 122.2(4) . . ?
C17 C16 C15 120.5(5) . . ?
C18 C17 C16 119.8(6) . . ?
C17 C18 C19 120.7(5) . . ?
C18 C19 C20 120.3(6) . . ?
C19 C20 C15 119.6(5) . . ?
C22 O21 C38 109.4(10) . . ?
O21 C22 C23 107.2(11) . . ?
O24 C23 C22 110.2(12) . . ?
C25 O24 C23 108.7(11) . . ?
O24 C25 C26 107.9(12) . . ?
O27 C26 C25 109.8(12) . . ?
C28 O27 C26 106.9(12) . . ?
O27 C28 C29 111.2(15) . . ?
O30 C29 C28 111.4(15) . . ?
C31 O30 C29 108.8(12) . . ?
O30 C31 C32 110.5(11) . . ?
O33 C32 C31 112.8(11) . . ?
C34 O33 C32 115.0(11) . . ?
O33 C34 C35 110.4(11) . . ?
O36 C35 C34 111.2(12) . . ?
C37 O36 C35 111.1(10) . . ?
O36 C37 C38 107.2(11) . . ?
O21 C38 C37 109.0(12) . . ?
C38' O21' C22' 113.1(7) . . ?
O21' C22' C23' 110.9(8) . . ?
O24' C23' C22' 109.9(8) . . ?
C23' O24' C25' 109.9(8) . . ?
O24' C25' C26' 110.8(8) . . ?
O27' C26' C25' 108.8(7) . . ?
C26' O27' C28' 110.5(7) . . ?
O27' C28' C29' 108.9(7) . . ?
O30' C29' C28' 107.5(7) . . ?
C31' O30' C29' 111.4(7) . . ?
O30' C31' C32' 109.8(7) . . ?
O33' C32' C31' 107.2(7) . . ?
C32' O33' C34' 110.9(7) . . ?
O33' C34' C35' 108.1(8) . . ?
O36' C35' C34' 109.4(7) . . ?
C37' O36' C35' 111.5(7) . . ?
O36' C37' C38' 107.5(7) . . ?
O21' C38' C37' 110.1(8) . . ?
O2 K1 O1 30.43(8) . . ?
O2 K1 Pd1 30.46(6) . . ?
O1 K1 Pd1 30.41(6) . . ?
C43 C44 C45 103.6(6) . . ?
C42 C43 C44 105.8(7) . . ?
O41 C42 C43 115.1(8) . . ?
C42 O41 C45 108.3(7) . . ?
O41 C45 C44 106.3(6) . . ?
 
loop_
 _geom_torsion_atom_site_label_1
 _geom_torsion_atom_site_label_2
 _geom_torsion_atom_site_label_3
 _geom_torsion_atom_site_label_4
 _geom_torsion
 _geom_torsion_site_symmetry_1
 _geom_torsion_site_symmetry_2
 _geom_torsion_site_symmetry_3
 _geom_torsion_site_symmetry_4
 _geom_torsion_publ_flag
C2 Pd1 P1 C9 61.2(2) . . . . ?
O1 Pd1 P1 C9 -118.56(18) . . . . ?
O2 Pd1 P1 C9 -117.3(3) . . . . ?
K1 Pd1 P1 C9 -68.83(16) . . . . ?
C2 Pd1 P1 C3 -60.2(2) . . . . ?
O1 Pd1 P1 C3 119.99(19) . . . . ?
O2 Pd1 P1 C3 121.3(3) . . . . ?
K1 Pd1 P1 C3 169.72(16) . . . . ?
C2 Pd1 P1 C15 179.7(2) . . . . ?
O1 Pd1 P1 C15 -0.1(2) . . . . ?
O2 Pd1 P1 C15 1.2(3) . . . . ?
K1 Pd1 P1 C15 49.68(17) . . . . ?
C2 Pd1 O2 O1 179.8(2) . . . . ?
P1 Pd1 O2 O1 -1.8(3) . . . . ?
K1 Pd1 O2 O1 -69.24(18) . . . . ?
C2 Pd1 O2 K1 -110.92(19) . . . . ?
O1 Pd1 O2 K1 69.24(17) . . . . ?
P1 Pd1 O2 K1 67.5(2) . . . . ?
K1 O2 O1 Pd1 -113.85(10) . . . . ?
Pd1 O2 O1 K1 113.85(10) . . . . ?
C2 Pd1 O1 O2 -0.4(5) . . . . ?
P1 Pd1 O1 O2 179.17(15) . . . . ?
K1 Pd1 O1 O2 63.58(16) . . . . ?
C2 Pd1 O1 K1 -63.9(4) . . . . ?
O2 Pd1 O1 K1 -63.58(16) . . . . ?
P1 Pd1 O1 K1 115.59(9) . . . . ?
O1 Pd1 C2 N2 -71(10) . . . . ?
O2 Pd1 C2 N2 -71(10) . . . . ?
P1 Pd1 C2 N2 109(10) . . . . ?
K1 Pd1 C2 N2 -118(10) . . . . ?
C9 P1 C3 C8 107.6(4) . . . . ?
C15 P1 C3 C8 -1.6(4) . . . . ?
Pd1 P1 C3 C8 -126.3(3) . . . . ?
C9 P1 C3 C4 -74.3(4) . . . . ?
C15 P1 C3 C4 176.5(4) . . . . ?
Pd1 P1 C3 C4 51.8(4) . . . . ?
C8 C3 C4 C5 0.0(8) . . . . ?
P1 C3 C4 C5 -178.1(4) . . . . ?
C3 C4 C5 C6 -0.5(9) . . . . ?
C4 C5 C6 C7 0.4(10) . . . . ?
C5 C6 C7 C8 0.1(9) . . . . ?
C4 C3 C8 C7 0.5(7) . . . . ?
P1 C3 C8 C7 178.5(4) . . . . ?
C6 C7 C8 C3 -0.5(8) . . . . ?
C3 P1 C9 C14 162.1(4) . . . . ?
C15 P1 C9 C14 -89.6(4) . . . . ?
Pd1 P1 C9 C14 33.4(4) . . . . ?
C3 P1 C9 C10 -18.0(4) . . . . ?
C15 P1 C9 C10 90.2(4) . . . . ?
Pd1 P1 C9 C10 -146.8(3) . . . . ?
C14 C9 C10 C11 -1.1(7) . . . . ?
P1 C9 C10 C11 179.1(4) . . . . ?
C9 C10 C11 C12 0.7(7) . . . . ?
C10 C11 C12 C13 0.4(8) . . . . ?
C11 C12 C13 C14 -1.1(8) . . . . ?
C10 C9 C14 C13 0.4(7) . . . . ?
P1 C9 C14 C13 -179.8(4) . . . . ?
C12 C13 C14 C9 0.7(8) . . . . ?
C9 P1 C15 C20 157.4(4) . . . . ?
C3 P1 C15 C20 -94.0(4) . . . . ?
Pd1 P1 C15 C20 34.0(4) . . . . ?
C9 P1 C15 C16 -23.8(4) . . . . ?
C3 P1 C15 C16 84.9(4) . . . . ?
Pd1 P1 C15 C16 -147.2(3) . . . . ?
C20 C15 C16 C17 1.0(7) . . . . ?
P1 C15 C16 C17 -177.8(4) . . . . ?
C15 C16 C17 C18 -1.2(8) . . . . ?
C16 C17 C18 C19 0.2(9) . . . . ?
C17 C18 C19 C20 0.9(9) . . . . ?
C18 C19 C20 C15 -1.0(8) . . . . ?
C16 C15 C20 C19 0.1(7) . . . . ?
P1 C15 C20 C19 178.9(4) . . . . ?
C38 O21 C22 C23 -178.6(11) . . . . ?
O21 C22 C23 O24 -62.3(15) . . . . ?
C22 C23 O24 C25 177.7(11) . . . . ?
C23 O24 C25 C26 179.7(11) . . . . ?
O24 C25 C26 O27 62.3(16) . . . . ?
C25 C26 O27 C28 -175.3(13) . . . . ?
C26 O27 C28 C29 172.9(14) . . . . ?
O27 C28 C29 O30 -62(2) . . . . ?
C28 C29 O30 C31 179.1(14) . . . . ?
C29 O30 C31 C32 -172.2(13) . . . . ?
O30 C31 C32 O33 59.8(15) . . . . ?
C31 C32 O33 C34 -178.7(11) . . . . ?
C32 O33 C34 C35 175.7(12) . . . . ?
O33 C34 C35 O36 -61.8(16) . . . . ?
C34 C35 O36 C37 -173.7(12) . . . . ?
C35 O36 C37 C38 175.5(11) . . . . ?
C22 O21 C38 C37 -179.8(12) . . . . ?
O36 C37 C38 O21 62.0(15) . . . . ?
C38' O21' C22' C23' -173.9(8) . . . . ?
O21' C22' C23' O24' -60.2(11) . . . . ?
C22' C23' O24' C25' 171.0(8) . . . . ?
C23' O24' C25' C26' 172.2(8) . . . . ?
O24' C25' C26' O27' 60.8(10) . . . . ?
C25' C26' O27' C28' -173.4(8) . . . . ?
C26' O27' C28' C29' -176.7(7) . . . . ?
O27' C28' C29' O30' -64.3(9) . . . . ?
C28' C29' O30' C31' -175.2(7) . . . . ?
C29' O30' C31' C32' -176.9(7) . . . . ?
O30' C31' C32' O33' 62.7(8) . . . . ?
C31' C32' O33' C34' 173.3(7) . . . . ?
C32' O33' C34' C35' 177.9(7) . . . . ?
O33' C34' C35' O36' -67.6(10) . . . . ?
C34' C35' O36' C37' -176.6(7) . . . . ?
C35' O36' C37' C38' -179.2(7) . . . . ?
C22' O21' C38' C37' -176.0(8) . . . . ?
O36' C37' C38' O21' 63.6(10) . . . . ?
Pd1 O2 K1 O1 -62.33(16) . . . . ?
O1 O2 K1 Pd1 62.33(16) . . . . ?
Pd1 O1 K1 O2 62.51(17) . . . . ?
O2 O1 K1 Pd1 -62.51(17) . . . . ?
C2 Pd1 K1 O2 91.1(2) . . . . ?
O1 Pd1 K1 O2 -62.42(17) . . . . ?
P1 Pd1 K1 O2 -151.11(13) . . . . ?
C2 Pd1 K1 O1 153.5(2) . . . . ?
O2 Pd1 K1 O1 62.42(17) . . . . ?
P1 Pd1 K1 O1 -88.70(13) . . . . ?
C45 C44 C43 C42 -2.3(9) . . . . ?
C44 C43 C42 O41 -4.1(14) . . . . ?
C43 C42 O41 C45 8.9(15) . . . . ?
C42 O41 C45 C44 -9.8(12) . . . . ?
C43 C44 C45 O41 7.1(9) . . . . ?
 
_diffrn_measured_fraction_theta_max    0.998
_diffrn_reflns_theta_full              27.18
_diffrn_measured_fraction_theta_full   0.998
_refine_diff_density_max    0.720
_refine_diff_density_min   -0.710
_refine_diff_density_rms    0.096
#===END

data_07074
 
_audit_creation_method            SHELXL-97
_chemical_name_systematic
;
 ?
;
_chemical_name_common             ?
_chemical_melting_point           ?
_chemical_formula_moiety          ?
_chemical_formula_sum
 'C27 H60 N6'
_chemical_formula_weight          468.81
 
loop_
 _atom_type_symbol
 _atom_type_description
 _atom_type_scat_dispersion_real
 _atom_type_scat_dispersion_imag
 _atom_type_scat_source
 'C'  'C'   0.0033   0.0016
 'International Tables Vol C Tables 4.2.6.8 and 6.1.1.4'
 'H'  'H'   0.0000   0.0000
 'International Tables Vol C Tables 4.2.6.8 and 6.1.1.4'
 'N'  'N'   0.0061   0.0033
 'International Tables Vol C Tables 4.2.6.8 and 6.1.1.4'
 
_symmetry_cell_setting            Monoclinic
_symmetry_space_group_name_H-M    P2(1)/n
 
loop_
 _symmetry_equiv_pos_as_xyz
 'x, y, z'
 '-x, y+1/2, -z+1/2'
 '-x, -y, -z'
 'x, -y-1/2, z-1/2'
 
_cell_length_a                    12.025(3)
_cell_length_b                    20.710(4)
_cell_length_c                    14.224(3)
_cell_angle_alpha                 90.00
_cell_angle_beta                  123.980(14)
_cell_angle_gamma                 90.00
_cell_volume                      2937.4(11)
_cell_formula_units_Z             4
_cell_measurement_temperature     293(2)
_cell_measurement_reflns_used     ?
_cell_measurement_theta_min       ?
_cell_measurement_theta_max       ?
 
_exptl_crystal_description        ireg.blok
_exptl_crystal_colour             colourless
_exptl_crystal_size_min           0.270
_exptl_crystal_size_mid           0.320
_exptl_crystal_size_max           0.320
_exptl_crystal_density_meas       ?
_exptl_crystal_density_diffrn     1.060
_exptl_crystal_density_method     'not measured'
_exptl_crystal_F_000              1056
_exptl_absorpt_coefficient_mu     0.063
_exptl_absorpt_correction_type    none
_exptl_absorpt_correction_T_min   ?
_exptl_absorpt_correction_T_max   ?
_exptl_absorpt_process_details    ?
 
_exptl_special_details
;
 ?
;
 
_diffrn_ambient_temperature       293(2)
_diffrn_radiation_wavelength      0.71073
_diffrn_radiation_type            MoK\a
_diffrn_radiation_source          'fine-focus sealed tube'
_diffrn_radiation_monochromator   graphite
_diffrn_measurement_device_type   'Bruker P4'
_diffrn_measurement_method        '\w scans'
_diffrn_detector_area_resol_mean  ?
_diffrn_standards_number          ?
_diffrn_standards_interval_count  ?
_diffrn_standards_interval_time   ?
_diffrn_standards_decay_%         ?
_diffrn_reflns_number             35142
_diffrn_reflns_av_R_equivalents   0.0636
_diffrn_reflns_av_sigmaI/netI     0.0426
_diffrn_reflns_limit_h_min        -15
_diffrn_reflns_limit_h_max        15
_diffrn_reflns_limit_k_min        -25
_diffrn_reflns_limit_k_max        25
_diffrn_reflns_limit_l_min        -17
_diffrn_reflns_limit_l_max        17
_diffrn_reflns_theta_min          1.97
_diffrn_reflns_theta_max          26.37
_reflns_number_total              5992
_reflns_number_gt                 4025
_reflns_threshold_expression      >2sigma(I)
 
_computing_data_collection        'Bruker XSCANS'
_computing_cell_refinement        'Bruker XSCANS'
_computing_data_reduction         'Bruker SHELXTL'
_computing_structure_solution     'SHELXS-97 (Sheldrick, 1990)'
_computing_structure_refinement   'SHELXL-97 (Sheldrick, 1997)'
_computing_molecular_graphics     'Bruker SHELXTL'
_computing_publication_material   'Bruker SHELXTL'
 
_refine_special_details
;
 Refinement of F^2^ against ALL reflections.  The weighted R-factor wR and
 goodness of fit S are based on F^2^, conventional R-factors R are based
 on F, with F set to zero for negative F^2^. The threshold expression of
 F^2^ > 2sigma(F^2^) is used only for calculating R-factors(gt) etc. and is
 not relevant to the choice of reflections for refinement.  R-factors based
 on F^2^ are statistically about twice as large as those based on F, and R-
 factors based on ALL data will be even larger.
;
 
_refine_ls_structure_factor_coef  Fsqd
_refine_ls_matrix_type            full
_refine_ls_weighting_scheme       calc
_refine_ls_weighting_details
 'calc w=1/[\s^2^(Fo^2^)+(0.0968P)^2^+0.9798P] where P=(Fo^2^+2Fc^2^)/3'
_atom_sites_solution_primary      direct
_atom_sites_solution_secondary    difmap
_atom_sites_solution_hydrogens    geom
_refine_ls_hydrogen_treatment     riding
_refine_ls_extinction_method      SHELXL
_refine_ls_extinction_coef        0.0038(9)
_refine_ls_extinction_expression
 'Fc^*^=kFc[1+0.001xFc^2^\l^3^/sin(2\q)]^-1/4^'
_refine_ls_number_reflns          5992
_refine_ls_number_parameters      317
_refine_ls_number_restraints      0
_refine_ls_R_factor_all           0.0940
_refine_ls_R_factor_gt            0.0622
_refine_ls_wR_factor_ref          0.1945
_refine_ls_wR_factor_gt           0.1677
_refine_ls_goodness_of_fit_ref    1.052
_refine_ls_restrained_S_all       1.052
_refine_ls_shift/su_max           0.001
_refine_ls_shift/su_mean          0.000
 
loop_
 _atom_site_label
 _atom_site_type_symbol
 _atom_site_fract_x
 _atom_site_fract_y
 _atom_site_fract_z
 _atom_site_U_iso_or_equiv
 _atom_site_adp_type
 _atom_site_occupancy
 _atom_site_symmetry_multiplicity
 _atom_site_calc_flag
 _atom_site_refinement_flags
 _atom_site_disorder_assembly
 _atom_site_disorder_group
N1 N 0.77944(13) 0.26007(7) 0.24429(12) 0.0211(3) Uani 1 1 d . . .
C1 C 0.80738(18) 0.22162(9) 0.34642(15) 0.0268(4) Uani 1 1 d . . .
H1A H 0.7246 0.2179 0.3427 0.032 Uiso 1 1 calc R . .
H1B H 0.8345 0.1784 0.3414 0.032 Uiso 1 1 calc R . .
C2 C 0.91402(19) 0.24982(9) 0.46063(15) 0.0312(4) Uani 1 1 d . . .
H2A H 0.9249 0.2226 0.5199 0.047 Uiso 1 1 calc R . .
H2B H 0.8873 0.2922 0.4678 0.047 Uiso 1 1 calc R . .
H2C H 0.9975 0.2525 0.4666 0.047 Uiso 1 1 calc R . .
N2 N 0.25296(13) 0.41785(6) 0.24127(11) 0.0203(3) Uani 1 1 d . . .
C3 C 0.90522(17) 0.26730(9) 0.24493(15) 0.0253(4) Uani 1 1 d . . .
H3A H 0.8843 0.2936 0.1806 0.030 Uiso 1 1 calc R . .
H3B H 0.9719 0.2903 0.3132 0.030 Uiso 1 1 calc R . .
N3 N 0.27678(14) 0.07465(7) 0.23940(12) 0.0212(3) Uani 1 1 d . . .
C4 C 0.96548(19) 0.20470(10) 0.24004(17) 0.0351(5) Uani 1 1 d . . .
H4A H 1.0440 0.2135 0.2402 0.053 Uiso 1 1 calc R . .
H4B H 0.9012 0.1819 0.1720 0.053 Uiso 1 1 calc R . .
H4C H 0.9897 0.1788 0.3048 0.053 Uiso 1 1 calc R . .
C5 C 0.67154(18) 0.22320(9) 0.13953(15) 0.0281(4) Uani 1 1 d . . .
H5A H 0.7040 0.1799 0.1426 0.034 Uiso 1 1 calc R . .
H5B H 0.5929 0.2195 0.1421 0.034 Uiso 1 1 calc R . .
C6 C 0.6303(2) 0.25326(10) 0.02818(16) 0.0373(5) Uani 1 1 d . . .
H6A H 0.5632 0.2269 -0.0329 0.056 Uiso 1 1 calc R . .
H6B H 0.7070 0.2565 0.0238 0.056 Uiso 1 1 calc R . .
H6C H 0.5946 0.2956 0.0226 0.056 Uiso 1 1 calc R . .
C7 C 0.73232(17) 0.32793(8) 0.24558(15) 0.0251(4) Uani 1 1 d . . .
H7A H 0.8034 0.3498 0.3131 0.030 Uiso 1 1 calc R . .
H7B H 0.7181 0.3512 0.1805 0.030 Uiso 1 1 calc R . .
C8 C 0.60535(19) 0.33178(10) 0.24336(17) 0.0344(5) Uani 1 1 d . . .
H8A H 0.5819 0.3762 0.2420 0.052 Uiso 1 1 calc R . .
H8B H 0.6196 0.3112 0.3098 0.052 Uiso 1 1 calc R . .
H8C H 0.5339 0.3103 0.1769 0.052 Uiso 1 1 calc R . .
C9 C 0.39682(18) 0.42411(10) 0.34146(16) 0.0317(5) Uani 1 1 d . . .
H9A H 0.4312 0.4655 0.3367 0.038 Uiso 1 1 calc R . .
H9B H 0.4495 0.3907 0.3361 0.038 Uiso 1 1 calc R . .
C10 C 0.4172(2) 0.41908(10) 0.45699(16) 0.0358(5) Uani 1 1 d . . .
H10A H 0.5113 0.4203 0.5155 0.054 Uiso 1 1 calc R . .
H10B H 0.3799 0.3792 0.4616 0.054 Uiso 1 1 calc R . .
H10C H 0.3732 0.4546 0.4667 0.054 Uiso 1 1 calc R . .
C11 C 0.2549(2) 0.42325(10) 0.13540(16) 0.0325(5) Uani 1 1 d . . .
H11A H 0.2926 0.4648 0.1362 0.039 Uiso 1 1 calc R . .
H11B H 0.3138 0.3901 0.1384 0.039 Uiso 1 1 calc R . .
C12 C 0.1194(2) 0.41660(11) 0.02516(17) 0.0394(5) Uani 1 1 d . . .
H12A H 0.1287 0.4220 -0.0372 0.059 Uiso 1 1 calc R . .
H12B H 0.0599 0.4490 0.0213 0.059 Uiso 1 1 calc R . .
H12C H 0.0834 0.3746 0.0212 0.059 Uiso 1 1 calc R . .
C13 C 0.19271(19) 0.35398(9) 0.24321(17) 0.0306(4) Uani 1 1 d . . .
H13A H 0.0998 0.3526 0.1793 0.037 Uiso 1 1 calc R . .
H13B H 0.1939 0.3518 0.3119 0.037 Uiso 1 1 calc R . .
C14 C 0.2649(2) 0.29508(9) 0.23828(18) 0.0388(5) Uani 1 1 d . . .
H14A H 0.2275 0.2567 0.2479 0.058 Uiso 1 1 calc R . .
H14B H 0.3586 0.2977 0.2977 0.058 Uiso 1 1 calc R . .
H14C H 0.2542 0.2937 0.1662 0.058 Uiso 1 1 calc R . .
C15 C 0.16568(19) 0.47001(9) 0.24351(17) 0.0316(5) Uani 1 1 d . . .
H15A H 0.0737 0.4631 0.1802 0.038 Uiso 1 1 calc R . .
H15B H 0.1683 0.4653 0.3126 0.038 Uiso 1 1 calc R . .
C16 C 0.2053(2) 0.53836(9) 0.23759(18) 0.0394(5) Uani 1 1 d . . .
H16A H 0.1464 0.5681 0.2410 0.059 Uiso 1 1 calc R . .
H16B H 0.1988 0.5444 0.1678 0.059 Uiso 1 1 calc R . .
H16C H 0.2959 0.5460 0.3003 0.059 Uiso 1 1 calc R . .
C17 C 0.40259(17) 0.06555(9) 0.24089(16) 0.0277(4) Uani 1 1 d . . .
H17A H 0.4668 0.0413 0.3084 0.033 Uiso 1 1 calc R . .
H17B H 0.3803 0.0396 0.1758 0.033 Uiso 1 1 calc R . .
C18 C 0.4692(2) 0.12679(11) 0.23900(19) 0.0416(5) Uani 1 1 d . . .
H18A H 0.5470 0.1161 0.2392 0.062 Uiso 1 1 calc R . .
H18B H 0.4955 0.1522 0.3048 0.062 Uiso 1 1 calc R . .
H18C H 0.4075 0.1510 0.1719 0.062 Uiso 1 1 calc R . .
C19 C 0.30600(19) 0.11234(9) 0.34255(15) 0.0273(4) Uani 1 1 d . . .
H19A H 0.3404 0.1545 0.3414 0.033 Uiso 1 1 calc R . .
H19B H 0.2222 0.1191 0.3362 0.033 Uiso 1 1 calc R . .
C20 C 0.4043(2) 0.08113(9) 0.45558(16) 0.0336(5) Uani 1 1 d . . .
H20A H 0.4165 0.1083 0.5153 0.050 Uiso 1 1 calc R . .
H20B H 0.4888 0.0753 0.4642 0.050 Uiso 1 1 calc R . .
H20C H 0.3703 0.0399 0.4591 0.050 Uiso 1 1 calc R . .
C21 C 0.17200(18) 0.11353(9) 0.13589(15) 0.0274(4) Uani 1 1 d . . .
H21A H 0.0948 0.1199 0.1398 0.033 Uiso 1 1 calc R . .
H21B H 0.2091 0.1557 0.1394 0.033 Uiso 1 1 calc R . .
C22 C 0.1251(2) 0.08324(9) 0.02302(16) 0.0339(5) Uani 1 1 d . . .
H22A H 0.0607 0.1111 -0.0370 0.051 Uiso 1 1 calc R . .
H22B H 0.0843 0.0422 0.0169 0.051 Uiso 1 1 calc R . .
H22C H 0.2003 0.0772 0.0174 0.051 Uiso 1 1 calc R . .
C23 C 0.22476(17) 0.00759(8) 0.23761(16) 0.0261(4) Uani 1 1 d . . .
H23A H 0.2092 -0.0152 0.1717 0.031 Uiso 1 1 calc R . .
H23B H 0.2939 -0.0156 0.3043 0.031 Uiso 1 1 calc R . .
C24 C 0.09736(19) 0.00597(10) 0.23467(17) 0.0340(5) Uani 1 1 d . . .
H24A H 0.0722 -0.0381 0.2343 0.051 Uiso 1 1 calc R . .
H24B H 0.0270 0.0274 0.1675 0.051 Uiso 1 1 calc R . .
H24C H 0.1119 0.0276 0.3004 0.051 Uiso 1 1 calc R . .
N25 N 0.8222(3) 0.10305(12) 0.5400(2) 0.0662(6) Uani 1 1 d . . .
C25 C 0.7398(3) 0.07017(13) 0.4976(2) 0.0530(6) Uani 1 1 d . . .
C26 C 1.2397(3) 0.27312(14) 0.4801(2) 0.0578(7) Uani 1 1 d . . .
N26 N 1.3022(3) 0.23694(17) 0.5007(2) 0.0913(10) Uani 1 1 d . . .
C27 C 0.8065(3) 0.40738(14) 0.5002(3) 0.0647(8) Uani 1 1 d . . .
N27 N 0.7292(3) 0.43422(17) 0.4868(3) 0.0875(9) Uani 1 1 d . . .
 
loop_
 _atom_site_aniso_label
 _atom_site_aniso_U_11
 _atom_site_aniso_U_22
 _atom_site_aniso_U_33
 _atom_site_aniso_U_23
 _atom_site_aniso_U_13
 _atom_site_aniso_U_12
N1 0.0211(7) 0.0211(7) 0.0202(8) 0.0000(6) 0.0110(6) -0.0013(5)
C1 0.0313(10) 0.0256(9) 0.0238(9) 0.0043(7) 0.0156(8) -0.0001(7)
C2 0.0349(10) 0.0362(10) 0.0204(9) 0.0027(8) 0.0142(8) 0.0012(8)
N2 0.0199(7) 0.0228(8) 0.0190(7) -0.0003(6) 0.0113(6) -0.0007(6)
C3 0.0234(9) 0.0295(9) 0.0247(9) 0.0004(7) 0.0144(8) -0.0020(7)
N3 0.0213(7) 0.0210(7) 0.0190(7) -0.0010(6) 0.0098(6) 0.0002(5)
C4 0.0327(10) 0.0414(11) 0.0323(11) -0.0007(9) 0.0188(9) 0.0070(9)
C5 0.0255(9) 0.0287(9) 0.0251(10) -0.0057(7) 0.0111(8) -0.0074(7)
C6 0.0336(11) 0.0469(12) 0.0231(10) -0.0048(9) 0.0109(9) -0.0047(9)
C7 0.0273(9) 0.0220(9) 0.0230(9) 0.0002(7) 0.0122(8) 0.0016(7)
C8 0.0298(10) 0.0430(12) 0.0295(10) 0.0009(9) 0.0160(9) 0.0072(8)
C9 0.0230(9) 0.0396(11) 0.0291(10) 0.0000(8) 0.0125(8) -0.0012(8)
C10 0.0310(10) 0.0437(12) 0.0224(10) -0.0033(8) 0.0086(8) -0.0031(9)
C11 0.0368(11) 0.0355(11) 0.0295(10) 0.0014(8) 0.0213(9) 0.0006(8)
C12 0.0405(12) 0.0482(13) 0.0203(10) -0.0001(9) 0.0114(9) 0.0003(9)
C13 0.0314(10) 0.0300(10) 0.0289(10) -0.0001(8) 0.0158(8) -0.0044(8)
C14 0.0538(13) 0.0244(10) 0.0376(12) 0.0006(8) 0.0251(10) 0.0033(9)
C15 0.0326(10) 0.0305(10) 0.0329(11) -0.0004(8) 0.0191(9) 0.0038(8)
C16 0.0519(13) 0.0253(10) 0.0387(12) 0.0009(8) 0.0239(10) 0.0031(9)
C17 0.0230(9) 0.0352(10) 0.0256(9) 0.0008(8) 0.0141(8) 0.0020(7)
C18 0.0328(11) 0.0489(13) 0.0411(12) 0.0050(10) 0.0195(10) -0.0088(9)
C19 0.0321(10) 0.0245(9) 0.0232(9) -0.0043(7) 0.0142(8) 0.0002(7)
C20 0.0364(11) 0.0360(11) 0.0219(10) -0.0012(8) 0.0124(9) 0.0015(8)
C21 0.0286(10) 0.0243(9) 0.0246(9) 0.0036(7) 0.0120(8) 0.0063(7)
C22 0.0358(11) 0.0361(11) 0.0226(10) 0.0012(8) 0.0119(9) 0.0008(8)
C23 0.0277(9) 0.0219(9) 0.0264(9) -0.0001(7) 0.0137(8) -0.0012(7)
C24 0.0303(10) 0.0423(11) 0.0293(10) -0.0017(9) 0.0165(9) -0.0071(8)
N25 0.0764(17) 0.0614(15) 0.0609(15) 0.0137(12) 0.0383(14) 0.0130(13)
C25 0.0464(14) 0.0485(14) 0.0508(15) 0.0086(12) 0.0189(12) 0.0024(12)
C26 0.0653(18) 0.0569(16) 0.0475(16) 0.0002(13) 0.0292(14) 0.0109(14)
N26 0.089(2) 0.125(3) 0.0484(15) -0.0020(16) 0.0313(15) 0.0295(19)
C27 0.0576(18) 0.0525(16) 0.0588(18) -0.0113(13) 0.0171(15) 0.0081(13)
N27 0.0680(18) 0.113(2) 0.085(2) -0.0401(18) 0.0452(17) -0.0315(17)
 
_geom_special_details
;
 All esds (except the esd in the dihedral angle between two l.s. planes)
 are estimated using the full covariance matrix.  The cell esds are taken
 into account individually in the estimation of esds in distances, angles
 and torsion angles; correlations between esds in cell parameters are only
 used when they are defined by crystal symmetry.  An approximate (isotropic)
 treatment of cell esds is used for estimating esds involving l.s. planes.
;
 
loop_
 _geom_bond_atom_site_label_1
 _geom_bond_atom_site_label_2
 _geom_bond_distance
 _geom_bond_site_symmetry_2
 _geom_bond_publ_flag
N1 C3 1.515(2) . ?
N1 C7 1.519(2) . ?
N1 C1 1.520(2) . ?
N1 C5 1.525(2) . ?
C1 C2 1.515(3) . ?
N2 C9 1.511(2) . ?
N2 C13 1.516(2) . ?
N2 C15 1.519(2) . ?
N2 C11 1.523(2) . ?
C3 C4 1.506(3) . ?
N3 C17 1.513(2) . ?
N3 C23 1.518(2) . ?
N3 C19 1.520(2) . ?
N3 C21 1.526(2) . ?
C5 C6 1.505(3) . ?
C7 C8 1.512(3) . ?
C9 C10 1.524(3) . ?
C11 C12 1.509(3) . ?
C13 C14 1.521(3) . ?
C15 C16 1.511(3) . ?
C17 C18 1.508(3) . ?
C19 C20 1.509(3) . ?
C21 C22 1.509(3) . ?
C23 C24 1.509(3) . ?
N25 C25 1.068(3) . ?
C26 N26 0.983(3) . ?
C27 N27 1.005(4) . ?
 
loop_
 _geom_angle_atom_site_label_1
 _geom_angle_atom_site_label_2
 _geom_angle_atom_site_label_3
 _geom_angle
 _geom_angle_site_symmetry_1
 _geom_angle_site_symmetry_3
 _geom_angle_publ_flag
C3 N1 C7 106.64(13) . . ?
C3 N1 C1 111.06(13) . . ?
C7 N1 C1 110.96(13) . . ?
C3 N1 C5 110.89(14) . . ?
C7 N1 C5 110.83(13) . . ?
C1 N1 C5 106.52(13) . . ?
C2 C1 N1 115.16(15) . . ?
C9 N2 C13 111.38(14) . . ?
C9 N2 C15 111.06(14) . . ?
C13 N2 C15 106.10(13) . . ?
C9 N2 C11 106.49(13) . . ?
C13 N2 C11 110.71(13) . . ?
C15 N2 C11 111.17(14) . . ?
C4 C3 N1 114.79(15) . . ?
C17 N3 C23 106.60(13) . . ?
C17 N3 C19 111.14(13) . . ?
C23 N3 C19 110.92(14) . . ?
C17 N3 C21 111.04(14) . . ?
C23 N3 C21 110.87(13) . . ?
C19 N3 C21 106.33(13) . . ?
C6 C5 N1 114.91(15) . . ?
C8 C7 N1 115.32(15) . . ?
N2 C9 C10 114.85(15) . . ?
C12 C11 N2 114.59(16) . . ?
N2 C13 C14 114.08(16) . . ?
C16 C15 N2 114.96(16) . . ?
C18 C17 N3 115.58(16) . . ?
C20 C19 N3 115.43(15) . . ?
C22 C21 N3 115.04(15) . . ?
C24 C23 N3 115.05(15) . . ?
 
loop_
 _geom_torsion_atom_site_label_1
 _geom_torsion_atom_site_label_2
 _geom_torsion_atom_site_label_3
 _geom_torsion_atom_site_label_4
 _geom_torsion
 _geom_torsion_site_symmetry_1
 _geom_torsion_site_symmetry_2
 _geom_torsion_site_symmetry_3
 _geom_torsion_site_symmetry_4
 _geom_torsion_publ_flag
C3 N1 C1 C2 58.5(2) . . . . ?
C7 N1 C1 C2 -59.92(19) . . . . ?
C5 N1 C1 C2 179.36(15) . . . . ?
C7 N1 C3 C4 -178.13(15) . . . . ?
C1 N1 C3 C4 60.86(19) . . . . ?
C5 N1 C3 C4 -57.38(19) . . . . ?
C3 N1 C5 C6 -58.4(2) . . . . ?
C7 N1 C5 C6 59.9(2) . . . . ?
C1 N1 C5 C6 -179.32(16) . . . . ?
C3 N1 C7 C8 179.10(15) . . . . ?
C1 N1 C7 C8 -59.83(19) . . . . ?
C5 N1 C7 C8 58.31(19) . . . . ?
C13 N2 C9 C10 -58.4(2) . . . . ?
C15 N2 C9 C10 59.6(2) . . . . ?
C11 N2 C9 C10 -179.24(16) . . . . ?
C9 N2 C11 C12 178.68(16) . . . . ?
C13 N2 C11 C12 57.5(2) . . . . ?
C15 N2 C11 C12 -60.2(2) . . . . ?
C9 N2 C13 C14 -60.5(2) . . . . ?
C15 N2 C13 C14 178.50(16) . . . . ?
C11 N2 C13 C14 57.8(2) . . . . ?
C9 N2 C15 C16 61.0(2) . . . . ?
C13 N2 C15 C16 -177.80(16) . . . . ?
C11 N2 C15 C16 -57.4(2) . . . . ?
C23 N3 C17 C18 178.11(15) . . . . ?
C19 N3 C17 C18 -60.9(2) . . . . ?
C21 N3 C17 C18 57.2(2) . . . . ?
C17 N3 C19 C20 -61.2(2) . . . . ?
C23 N3 C19 C20 57.2(2) . . . . ?
C21 N3 C19 C20 177.79(16) . . . . ?
C17 N3 C21 C22 60.8(2) . . . . ?
C23 N3 C21 C22 -57.5(2) . . . . ?
C19 N3 C21 C22 -178.17(15) . . . . ?
C17 N3 C23 C24 -179.37(15) . . . . ?
C19 N3 C23 C24 59.50(19) . . . . ?
C21 N3 C23 C24 -58.4(2) . . . . ?
 
_diffrn_measured_fraction_theta_max    0.998
_diffrn_reflns_theta_full              26.37
_diffrn_measured_fraction_theta_full   0.998
_refine_diff_density_max    0.679
_refine_diff_density_min   -0.280
_refine_diff_density_rms    0.052
#===END

data_07150
 
_audit_creation_method            SHELXL-97
_chemical_name_systematic
;
 ?
;
_chemical_name_common             ?
_chemical_melting_point           ?
_chemical_formula_moiety          ?
_chemical_formula_sum
 'C38 H30 N2 P2 Pd'
_chemical_formula_weight          682.98
 
loop_
 _atom_type_symbol
 _atom_type_description
 _atom_type_scat_dispersion_real
 _atom_type_scat_dispersion_imag
 _atom_type_scat_source
 'C'  'C'   0.0033   0.0016
 'International Tables Vol C Tables 4.2.6.8 and 6.1.1.4'
 'H'  'H'   0.0000   0.0000
 'International Tables Vol C Tables 4.2.6.8 and 6.1.1.4'
 'N'  'N'   0.0061   0.0033
 'International Tables Vol C Tables 4.2.6.8 and 6.1.1.4'
 'P'  'P'   0.1023   0.0942
 'International Tables Vol C Tables 4.2.6.8 and 6.1.1.4'
 'Pd'  'Pd'  -0.9988   1.0072
 'International Tables Vol C Tables 4.2.6.8 and 6.1.1.4'
 
_symmetry_cell_setting            Triclinic
_symmetry_space_group_name_H-M    P-1
 
loop_
 _symmetry_equiv_pos_as_xyz
 'x, y, z'
 '-x, -y, -z'
 
_cell_length_a                    9.1134(8)
_cell_length_b                    9.7354(8)
_cell_length_c                    10.2226(9)
_cell_angle_alpha                 110.8770(10)
_cell_angle_beta                  93.0840(10)
_cell_angle_gamma                 108.0970(10)
_cell_volume                      791.57(12)
_cell_formula_units_Z             1
_cell_measurement_temperature     293(2)
_cell_measurement_reflns_used     ?
_cell_measurement_theta_min       ?
_cell_measurement_theta_max       ?
 
_exptl_crystal_description        ireg.block
_exptl_crystal_colour             colourless
_exptl_crystal_size_min           0.200
_exptl_crystal_size_mid           0.240
_exptl_crystal_size_max           0.240
_exptl_crystal_density_meas       ?
_exptl_crystal_density_diffrn     1.433
_exptl_crystal_density_method     'not measured'
_exptl_crystal_F_000              348
_exptl_absorpt_coefficient_mu     0.717
_exptl_absorpt_correction_type    none
_exptl_absorpt_correction_T_min   ?
_exptl_absorpt_correction_T_max   ?
_exptl_absorpt_process_details    ?
 
_exptl_special_details
;
 ?
;
 
_diffrn_ambient_temperature       293(2)
_diffrn_radiation_wavelength      0.71073
_diffrn_radiation_type            MoK\a
_diffrn_radiation_source          'fine-focus sealed tube'
_diffrn_radiation_monochromator   graphite
_diffrn_measurement_device_type   'Bruker P4'
_diffrn_measurement_method        '\w scans'
_diffrn_detector_area_resol_mean  ?
_diffrn_standards_number          ?
_diffrn_standards_interval_count  ?
_diffrn_standards_interval_time   ?
_diffrn_standards_decay_%         ?
_diffrn_reflns_number             12835
_diffrn_reflns_av_R_equivalents   0.0305
_diffrn_reflns_av_sigmaI/netI     0.0308
_diffrn_reflns_limit_h_min        -12
_diffrn_reflns_limit_h_max        12
_diffrn_reflns_limit_k_min        -12
_diffrn_reflns_limit_k_max        12
_diffrn_reflns_limit_l_min        -13
_diffrn_reflns_limit_l_max        13
_diffrn_reflns_theta_min          2.17
_diffrn_reflns_theta_max          28.33
_reflns_number_total              3903
_reflns_number_gt                 3691
_reflns_threshold_expression      >2sigma(I)
 
_computing_data_collection        'Bruker XSCANS'
_computing_cell_refinement        'Bruker XSCANS'
_computing_data_reduction         'Bruker SHELXTL'
_computing_structure_solution     'SHELXS-97 (Sheldrick, 1990)'
_computing_structure_refinement   'SHELXL-97 (Sheldrick, 1997)'
_computing_molecular_graphics     'Bruker SHELXTL'
_computing_publication_material   'Bruker SHELXTL'
 
_refine_special_details
;
 Refinement of F^2^ against ALL reflections.  The weighted R-factor wR and
 goodness of fit S are based on F^2^, conventional R-factors R are based
 on F, with F set to zero for negative F^2^. The threshold expression of
 F^2^ > 2sigma(F^2^) is used only for calculating R-factors(gt) etc. and is
 not relevant to the choice of reflections for refinement.  R-factors based
 on F^2^ are statistically about twice as large as those based on F, and R-
 factors based on ALL data will be even larger.
;
 
_refine_ls_structure_factor_coef  Fsqd
_refine_ls_matrix_type            full
_refine_ls_weighting_scheme       calc
_refine_ls_weighting_details
 'calc w=1/[\s^2^(Fo^2^)+(0.0270P)^2^+0.3532P] where P=(Fo^2^+2Fc^2^)/3'
_atom_sites_solution_primary      direct
_atom_sites_solution_secondary    difmap
_atom_sites_solution_hydrogens    geom
_refine_ls_hydrogen_treatment     riding
_refine_ls_extinction_method      none
_refine_ls_extinction_coef        ?
_refine_ls_number_reflns          3903
_refine_ls_number_parameters      198
_refine_ls_number_restraints      0
_refine_ls_R_factor_all           0.0269
_refine_ls_R_factor_gt            0.0249
_refine_ls_wR_factor_ref          0.0631
_refine_ls_wR_factor_gt           0.0621
_refine_ls_goodness_of_fit_ref    1.074
_refine_ls_restrained_S_all       1.074
_refine_ls_shift/su_max           0.000
_refine_ls_shift/su_mean          0.000
 
loop_
 _atom_site_label
 _atom_site_type_symbol
 _atom_site_fract_x
 _atom_site_fract_y
 _atom_site_fract_z
 _atom_site_U_iso_or_equiv
 _atom_site_adp_type
 _atom_site_occupancy
 _atom_site_symmetry_multiplicity
 _atom_site_calc_flag
 _atom_site_refinement_flags
 _atom_site_disorder_assembly
 _atom_site_disorder_group
Pd1 Pd 0.5000 0.5000 0.5000 0.01814(6) Uani 1 2 d S . .
P1 P 0.48771(5) 0.27506(5) 0.30473(4) 0.01759(9) Uani 1 1 d . . .
N1 N 0.2167(2) 0.3088(2) 0.60221(19) 0.0354(4) Uani 1 1 d . . .
C1 C 0.3209(2) 0.3763(2) 0.56436(19) 0.0244(4) Uani 1 1 d . . .
C2 C 0.3669(2) 0.2602(2) 0.14907(18) 0.0201(3) Uani 1 1 d . . .
C3 C 0.3855(2) 0.3970(2) 0.1258(2) 0.0279(4) Uani 1 1 d . . .
H3A H 0.4528 0.4937 0.1924 0.034 Uiso 1 1 calc R . .
C4 C 0.3035(2) 0.3886(3) 0.0033(2) 0.0358(5) Uani 1 1 d . . .
H4A H 0.3171 0.4798 -0.0123 0.043 Uiso 1 1 calc R . .
C5 C 0.2023(2) 0.2466(3) -0.0955(2) 0.0375(5) Uani 1 1 d . . .
H5A H 0.1481 0.2420 -0.1776 0.045 Uiso 1 1 calc R . .
C6 C 0.1815(3) 0.1109(3) -0.0722(2) 0.0379(5) Uani 1 1 d . . .
H6A H 0.1124 0.0149 -0.1384 0.045 Uiso 1 1 calc R . .
C7 C 0.2635(2) 0.1173(2) 0.0496(2) 0.0301(4) Uani 1 1 d . . .
H7A H 0.2491 0.0257 0.0647 0.036 Uiso 1 1 calc R . .
C8 C 0.4128(2) 0.08124(19) 0.31174(18) 0.0231(3) Uani 1 1 d . . .
C9 C 0.2612(2) 0.0229(2) 0.3351(2) 0.0315(4) Uani 1 1 d . . .
H9A H 0.1986 0.0846 0.3507 0.038 Uiso 1 1 calc R . .
C10 C 0.2024(3) -0.1276(2) 0.3352(2) 0.0395(5) Uani 1 1 d . . .
H10A H 0.1008 -0.1663 0.3506 0.047 Uiso 1 1 calc R . .
C11 C 0.2957(3) -0.2189(2) 0.3125(2) 0.0429(6) Uani 1 1 d . . .
H11A H 0.2562 -0.3196 0.3117 0.052 Uiso 1 1 calc R . .
C12 C 0.4462(3) -0.1621(2) 0.2913(3) 0.0438(5) Uani 1 1 d . . .
H12A H 0.5088 -0.2235 0.2777 0.053 Uiso 1 1 calc R . .
C13 C 0.5053(3) -0.0124(2) 0.2901(2) 0.0322(4) Uani 1 1 d . . .
H13A H 0.6070 0.0254 0.2747 0.039 Uiso 1 1 calc R . .
C14 C 0.6794(2) 0.29096(19) 0.25639(18) 0.0204(3) Uani 1 1 d . . .
C15 C 0.7079(2) 0.2802(2) 0.12144(19) 0.0241(3) Uani 1 1 d . . .
H15A H 0.6260 0.2588 0.0504 0.029 Uiso 1 1 calc R . .
C16 C 0.8593(2) 0.3017(2) 0.0929(2) 0.0338(4) Uani 1 1 d . . .
H16A H 0.8791 0.2972 0.0035 0.041 Uiso 1 1 calc R . .
C17 C 0.9802(2) 0.3295(2) 0.1975(2) 0.0371(5) Uani 1 1 d . . .
H17A H 1.0810 0.3433 0.1780 0.044 Uiso 1 1 calc R . .
C18 C 0.9520(2) 0.3369(2) 0.3309(2) 0.0359(5) Uani 1 1 d . . .
H18A H 1.0330 0.3529 0.4001 0.043 Uiso 1 1 calc R . .
C19 C 0.8028(2) 0.3203(2) 0.3610(2) 0.0295(4) Uani 1 1 d . . .
H19A H 0.7847 0.3287 0.4518 0.035 Uiso 1 1 calc R . .
 
loop_
 _atom_site_aniso_label
 _atom_site_aniso_U_11
 _atom_site_aniso_U_22
 _atom_site_aniso_U_33
 _atom_site_aniso_U_23
 _atom_site_aniso_U_13
 _atom_site_aniso_U_12
Pd1 0.01944(10) 0.01687(9) 0.01865(10) 0.00675(7) 0.00630(7) 0.00694(7)
P1 0.0185(2) 0.01673(19) 0.0181(2) 0.00656(16) 0.00414(16) 0.00707(16)
N1 0.0342(9) 0.0361(9) 0.0361(9) 0.0182(8) 0.0124(8) 0.0073(8)
C1 0.0269(9) 0.0217(8) 0.0240(9) 0.0079(7) 0.0058(7) 0.0088(7)
C2 0.0194(8) 0.0246(8) 0.0200(8) 0.0100(7) 0.0060(6) 0.0109(7)
C3 0.0204(9) 0.0295(9) 0.0384(10) 0.0199(8) 0.0050(8) 0.0072(7)
C4 0.0266(10) 0.0482(12) 0.0494(13) 0.0373(11) 0.0090(9) 0.0137(9)
C5 0.0288(10) 0.0644(14) 0.0296(10) 0.0280(10) 0.0056(8) 0.0187(10)
C6 0.0390(12) 0.0425(12) 0.0250(10) 0.0070(9) -0.0022(9) 0.0136(10)
C7 0.0366(11) 0.0275(9) 0.0249(9) 0.0080(7) 0.0007(8) 0.0132(8)
C8 0.0297(9) 0.0183(7) 0.0187(8) 0.0074(6) 0.0009(7) 0.0056(7)
C9 0.0304(10) 0.0274(9) 0.0327(10) 0.0122(8) 0.0026(8) 0.0051(8)
C10 0.0392(12) 0.0321(10) 0.0340(11) 0.0141(9) 0.0010(9) -0.0052(9)
C11 0.0680(16) 0.0230(9) 0.0321(11) 0.0139(8) 0.0033(11) 0.0059(10)
C12 0.0649(16) 0.0283(10) 0.0480(13) 0.0197(10) 0.0136(12) 0.0232(11)
C13 0.0415(12) 0.0254(9) 0.0353(10) 0.0147(8) 0.0105(9) 0.0154(8)
C14 0.0198(8) 0.0180(7) 0.0222(8) 0.0050(6) 0.0042(7) 0.0083(6)
C15 0.0253(9) 0.0240(8) 0.0243(9) 0.0084(7) 0.0066(7) 0.0115(7)
C16 0.0333(11) 0.0362(10) 0.0344(10) 0.0128(9) 0.0173(9) 0.0150(9)
C17 0.0215(9) 0.0346(10) 0.0475(12) 0.0060(9) 0.0101(9) 0.0112(8)
C18 0.0224(10) 0.0376(11) 0.0387(11) 0.0040(9) -0.0028(8) 0.0132(8)
C19 0.0277(10) 0.0334(10) 0.0239(9) 0.0056(8) 0.0013(7) 0.0132(8)
 
_geom_special_details
;
 All esds (except the esd in the dihedral angle between two l.s. planes)
 are estimated using the full covariance matrix.  The cell esds are taken
 into account individually in the estimation of esds in distances, angles
 and torsion angles; correlations between esds in cell parameters are only
 used when they are defined by crystal symmetry.  An approximate (isotropic)
 treatment of cell esds is used for estimating esds involving l.s. planes.
;
 
loop_
 _geom_bond_atom_site_label_1
 _geom_bond_atom_site_label_2
 _geom_bond_distance
 _geom_bond_site_symmetry_2
 _geom_bond_publ_flag
Pd1 C1 2.0016(18) . ?
Pd1 C1 2.0016(18) 2_666 ?
Pd1 P1 2.3453(4) 2_666 ?
Pd1 P1 2.3453(4) . ?
P1 C14 1.8160(17) . ?
P1 C2 1.8202(17) . ?
P1 C8 1.8257(17) . ?
N1 C1 1.148(2) . ?
C2 C7 1.390(2) . ?
C2 C3 1.396(2) . ?
C3 C4 1.386(3) . ?
C4 C5 1.376(3) . ?
C5 C6 1.382(3) . ?
C6 C7 1.389(3) . ?
C8 C9 1.391(3) . ?
C8 C13 1.394(3) . ?
C9 C10 1.396(3) . ?
C10 C11 1.383(3) . ?
C11 C12 1.371(4) . ?
C12 C13 1.393(3) . ?
C14 C15 1.391(2) . ?
C14 C19 1.395(2) . ?
C15 C16 1.393(3) . ?
C16 C17 1.383(3) . ?
C17 C18 1.381(3) . ?
C18 C19 1.383(3) . ?
 
loop_
 _geom_angle_atom_site_label_1
 _geom_angle_atom_site_label_2
 _geom_angle_atom_site_label_3
 _geom_angle
 _geom_angle_site_symmetry_1
 _geom_angle_site_symmetry_3
 _geom_angle_publ_flag
C1 Pd1 C1 180.0 . 2_666 ?
C1 Pd1 P1 88.05(5) . 2_666 ?
C1 Pd1 P1 91.95(5) 2_666 2_666 ?
C1 Pd1 P1 91.95(5) . . ?
C1 Pd1 P1 88.05(5) 2_666 . ?
P1 Pd1 P1 179.999(17) 2_666 . ?
C14 P1 C2 104.80(8) . . ?
C14 P1 C8 104.39(8) . . ?
C2 P1 C8 105.46(8) . . ?
C14 P1 Pd1 111.40(5) . . ?
C2 P1 Pd1 109.01(5) . . ?
C8 P1 Pd1 120.55(6) . . ?
N1 C1 Pd1 178.06(16) . . ?
C7 C2 C3 119.15(16) . . ?
C7 C2 P1 122.44(13) . . ?
C3 C2 P1 118.32(14) . . ?
C4 C3 C2 119.90(18) . . ?
C5 C4 C3 120.70(18) . . ?
C4 C5 C6 119.76(18) . . ?
C5 C6 C7 120.2(2) . . ?
C6 C7 C2 120.27(18) . . ?
C9 C8 C13 118.92(17) . . ?
C9 C8 P1 120.53(14) . . ?
C13 C8 P1 120.53(14) . . ?
C8 C9 C10 120.3(2) . . ?
C11 C10 C9 119.8(2) . . ?
C12 C11 C10 120.49(19) . . ?
C11 C12 C13 120.1(2) . . ?
C12 C13 C8 120.4(2) . . ?
C15 C14 C19 119.35(16) . . ?
C15 C14 P1 122.54(13) . . ?
C19 C14 P1 118.08(13) . . ?
C14 C15 C16 119.90(17) . . ?
C17 C16 C15 120.03(19) . . ?
C18 C17 C16 120.38(18) . . ?
C17 C18 C19 119.82(19) . . ?
C18 C19 C14 120.48(18) . . ?
 
loop_
 _geom_torsion_atom_site_label_1
 _geom_torsion_atom_site_label_2
 _geom_torsion_atom_site_label_3
 _geom_torsion_atom_site_label_4
 _geom_torsion
 _geom_torsion_site_symmetry_1
 _geom_torsion_site_symmetry_2
 _geom_torsion_site_symmetry_3
 _geom_torsion_site_symmetry_4
 _geom_torsion_publ_flag
C1 Pd1 P1 C14 -150.32(8) . . . . ?
C1 Pd1 P1 C14 29.68(8) 2_666 . . . ?
P1 Pd1 P1 C14 -24(10) 2_666 . . . ?
C1 Pd1 P1 C2 94.51(8) . . . . ?
C1 Pd1 P1 C2 -85.49(8) 2_666 . . . ?
P1 Pd1 P1 C2 -140(10) 2_666 . . . ?
C1 Pd1 P1 C8 -27.55(9) . . . . ?
C1 Pd1 P1 C8 152.45(9) 2_666 . . . ?
P1 Pd1 P1 C8 98(10) 2_666 . . . ?
C1 Pd1 C1 N1 -104(17) 2_666 . . . ?
P1 Pd1 C1 N1 40(5) 2_666 . . . ?
P1 Pd1 C1 N1 -140(5) . . . . ?
C14 P1 C2 C7 99.26(16) . . . . ?
C8 P1 C2 C7 -10.60(17) . . . . ?
Pd1 P1 C2 C7 -141.38(14) . . . . ?
C14 P1 C2 C3 -77.40(15) . . . . ?
C8 P1 C2 C3 172.73(14) . . . . ?
Pd1 P1 C2 C3 41.96(15) . . . . ?
C7 C2 C3 C4 -1.2(3) . . . . ?
P1 C2 C3 C4 175.54(15) . . . . ?
C2 C3 C4 C5 0.7(3) . . . . ?
C3 C4 C5 C6 0.3(3) . . . . ?
C4 C5 C6 C7 -0.6(3) . . . . ?
C5 C6 C7 C2 0.0(3) . . . . ?
C3 C2 C7 C6 0.9(3) . . . . ?
P1 C2 C7 C6 -175.74(16) . . . . ?
C14 P1 C8 C9 -174.90(15) . . . . ?
C2 P1 C8 C9 -64.74(16) . . . . ?
Pd1 P1 C8 C9 59.01(16) . . . . ?
C14 P1 C8 C13 3.42(17) . . . . ?
C2 P1 C8 C13 113.58(16) . . . . ?
Pd1 P1 C8 C13 -122.66(14) . . . . ?
C13 C8 C9 C10 -0.7(3) . . . . ?
P1 C8 C9 C10 177.67(15) . . . . ?
C8 C9 C10 C11 0.2(3) . . . . ?
C9 C10 C11 C12 0.7(3) . . . . ?
C10 C11 C12 C13 -1.1(3) . . . . ?
C11 C12 C13 C8 0.6(3) . . . . ?
C9 C8 C13 C12 0.3(3) . . . . ?
P1 C8 C13 C12 -178.09(16) . . . . ?
C2 P1 C14 C15 -4.22(16) . . . . ?
C8 P1 C14 C15 106.42(15) . . . . ?
Pd1 P1 C14 C15 -121.95(13) . . . . ?
C2 P1 C14 C19 173.60(14) . . . . ?
C8 P1 C14 C19 -75.76(15) . . . . ?
Pd1 P1 C14 C19 55.86(15) . . . . ?
C19 C14 C15 C16 -1.2(3) . . . . ?
P1 C14 C15 C16 176.60(14) . . . . ?
C14 C15 C16 C17 1.7(3) . . . . ?
C15 C16 C17 C18 -0.3(3) . . . . ?
C16 C17 C18 C19 -1.6(3) . . . . ?
C17 C18 C19 C14 2.1(3) . . . . ?
C15 C14 C19 C18 -0.7(3) . . . . ?
P1 C14 C19 C18 -178.59(15) . . . . ?
 
_diffrn_measured_fraction_theta_max    0.991
_diffrn_reflns_theta_full              28.33
_diffrn_measured_fraction_theta_full   0.991
_refine_diff_density_max    0.958
_refine_diff_density_min   -0.432
_refine_diff_density_rms    0.065
#===END
